# Supplementary material for: A programmable Cas9-serine recombinase fusion protein that operates on DNA sequences in mammalian cells
Source: PubMed Central journal article supplement (PMC5175349; doi:10.1093/nar/gkw707), 2016-08-11
Supplement: supp_gkw707_nar-01770-f-2016-File007.pdf [file supp_gkw707_nar-01770-f-2016-File007.pdf]

## A programmable Cas9-serine recombinase fusion protein that operates on DNA sequences in mammalian cells

Brian Chaikind, Jeff L. Bessen, David B. Thompson, Johnny H. Hu, and David R. Liu

|                                        |                                                                                        |
|----------------------------------------|----------------------------------------------------------------------------------------|
| <b>Figure S1</b>                       | Construction of reporter plasmids                                                      |
| <b>Table S1</b>                        | Oligonucleotides for gRNA construction                                                 |
| <b>Table S2</b>                        | Oligonucleotides and gBLOCKs for reporter construction                                 |
| <b>Table S3</b>                        | Oligonucleotides for recCas9 construction                                              |
| <b>Table S4</b>                        | Custom sequencing oligonucleotides                                                     |
| <b>Table S5</b>                        | Genomic PCR primers                                                                    |
| <b>Table S6</b>                        | List of target site sequences used in reporter assays                                  |
| <b>Table S7</b>                        | DNA sequences encoding GGS linkers                                                     |
| <b>Table S8</b>                        | List of gRNA sequences                                                                 |
| <b>Table S9</b>                        | recCas9 genomic targets identified <i>in silico</i>                                    |
| <b>Methods for supporting material</b> | Methods for reporter plasmid construction, episomal isolation, and DNA sequencing      |
| <b>Note S1</b>                         | DNA sequence of target sites flanking a KanR and PolyA stop sequences                  |
| <b>Note S2</b>                         | DNA and amino acid sequence of Gin $\beta$ -(GGS) <sub>8</sub> -dCas9-GGS-FLAG-GGS-NLS |
| <b>Note S3</b>                         | Source code for recCas9 genomic target identification                                  |
| <b>Note S4</b>                         | Limiting dilution quantification of recCas9 genomic deletion                           |

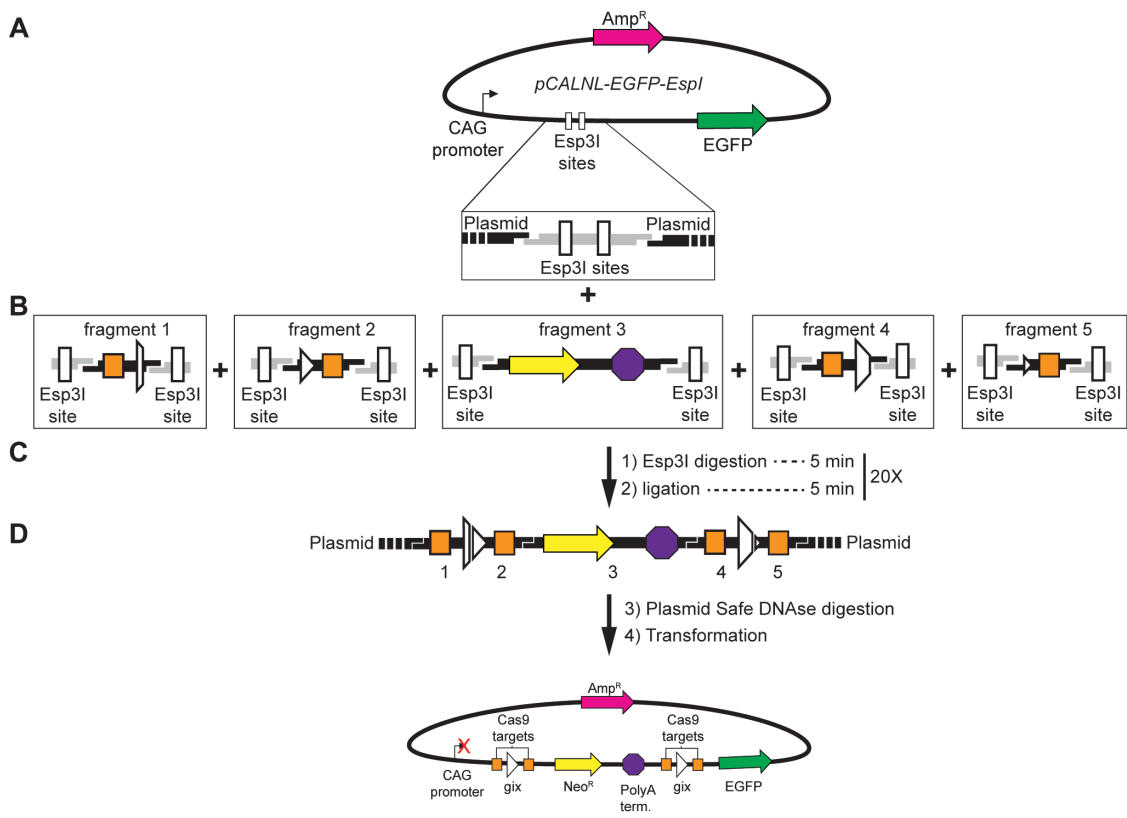

**Figure S1: Reporter plasmid construction.** Golden Gate assembly was used to construct the reporter plasmids described in this work. All assemblies started with a common plasmid, pCALNL-EGFP-Esp3I, that was derived from pCALNL-EGFP and contained to Esp3I restriction sites. The fragments shown are flanked by Esp3I sites. Esp3I digestion creates a series of compatible, unique 4-base pair 5' overhangs so that assembly occurs in the order shown. To assemble the target sites, Esp3I (ThermoFisher Scientific, Waltham, MA) and five fragments were added to a single reaction tube; to allow for iterative cycles of Esp3I digestion and T7 ligation. Reactions were then digested with Plasmid-Safe-ATP-dependent DNase (Epicentre, Madison, WI) to reduce background. Colonies were analyzed by colony PCR to identify PCR products that matched the expected full length 5 part assembly product; plasmid from these colonies was then sent for sanger sequencing. For the genomic reporters shown in Figure 4, fragments 1 and 2 as well as fragments 4 and 5 were combined into two gBlocks (IDT, Coralville, IA) fragments encoding the entire target site (not shown in the figure). Assembly was then completed as described above. Details for construction can be found in the methods for the supporting material. Oligonucleotides and gBLOCKS for creation of fragments can be found in Table S3.

**Table S1. Oligonucleotides for gRNA construction.**

| <b>Oligonucleotide Name</b>      | <b>Sequence</b>                               |
|----------------------------------|-----------------------------------------------|
| R.pHU6.TSS(-1).univ              | GGTGTTTCGTCCTTTCCACAAG                        |
| F.non-target                     | GCACACTAGTTAGGGATAACAGTT<br>TTAGAGCTAGAAATAGC |
| F.Chr10-1                        | GCCCATGACCCTTCTCCTCTGTTTT<br>AGAGCTAGAAATAGC  |
| F.Chr10-1-rev                    | GCTCAGGGCCTGTGATGGGAGGT<br>TTTAGAGCTAGAAATAGC |
| F.Chr10-2                        | GGCCCATGACCCTTCTCCTCGTTT<br>TAGAGCTAGAAATAGC  |
| F.Chr10-2rev                     | GCCTCAGGGCCTGTGATGGGAGTT<br>TTAGAGCTAGAAATAGC |
| F.Centromere_Chr_1_5_19-gRNA-for | GACTTGAAACACTCTTTTTTCGTTTT<br>AGAGCTAGAAATAGC |
| F.Centromere_Chr_1_5_19-gRNA-rev | GAGTTGAAGACACACAACACAGTT<br>TTAGAGCTAGAAATAGC |
| F.Ch5_155183064-gRNA-for         | GGAACTCATGTGATTAAGTGGTTTT<br>AGAGCTAGAAATAGC  |
| F.Ch5_155183064-gRNA-rev-1       | GTCTACCTCTCATGAGCCGGTGTT<br>TTAGAGCTAGAAATAGC |
| F.Ch5_169395198-gRNA-for         | GTTTCCCGCAGGATGTGGGATGTT<br>TTAGAGCTAGAAATAGC |
| F.Ch5_169395198-gRNA-rev         | GCCTGGGGATTTATGTTCTTAGTTT<br>TAGAGCTAGAAATAGC |
| F.Ch12_62418577-gRNA-for         | GAAATAGCACAATGAATGGAAGTT<br>TTAGAGCTAGAAATAGC |
| F.Ch12_62418577-gRNA-rev         | GACTTTTTGGGGGAGAGGGAGGTT<br>TTAGAGCTAGAAATAGC |
| F.Ch13_102010574-gRNA-for        | GGAGACTTAAGTCCAAAACCGTTT<br>TAGAGCTAGAAATAGC  |
| F.Ch13_102010574-gRNA-rev        | GTCAGCTATGATCACTTCCCTGTTT<br>TAGAGCTAGAAATAGC |

**Table S2. Oligonucleotides and gBlocks for reporter construction.**

| <b>Construct Name</b> | <b>Sequence</b>                                                         |
|-----------------------|-------------------------------------------------------------------------|
| 1-0bp-for             | TCGTCTCGGCGTCCCCAATTTTCCCAAAC<br>AGAGGTCTGTAAACCGAGGTGAGACGG            |
| 1-0bp-rev             | CCGTCTCACCTCGGTTTACAGACCTCTGT<br>TTGGGAAAATTGGGGACGCCGAGACGA            |
| 1-1bp-for             | TCGTCTCGGCGTCCCCAATTTTCCCAAAC<br>AGAGGTtCTGTAAACCGAGGTGAGACGG           |
| 1-1bp-rev             | CCGTCTCACCTCGGTTTACAGaACCTCTG<br>TTTGGGAAAATTGGGGACGCCGAGACGA           |
| 1-2bp-for             | TCGTCTCGGCGTCCCCAATTTTCCCAAAC<br>AGAGGTatCTGTAAACCGAGGTGAGACGG          |
| 1-2bp-rev             | CCGTCTCACCTCGGTTTACAGatACCTCTG<br>TTTGGGAAAATTGGGGACGCCGAGACGA          |
| 1-3bp-for             | TCGTCTCGGCGTCCCCAATTTTCCCAAAC<br>AGAGGTaatCTGTAAACCGAGGTGAGACG<br>G     |
| 1-3bp-rev             | CCGTCTCACCTCGGTTTACAGattACCTCT<br>GTTTGGGAAAATTGGGGACGCCGAGACG<br>A     |
| 1-4bp-for             | TCGTCTCGGCGTCCCCAATTTTCCCAAAC<br>AGAGGTaaatCTGTAAACCGAGGTGAGACG<br>G    |
| 1-4bp-rev             | CCGTCTCACCTCGGTTTACAGatttACCTCT<br>GTTTGGGAAAATTGGGGACGCCGAGACG<br>A    |
| 1-5bp-for             | TCGTCTCGGCGTCCCCAATTTTCCCAAAC<br>AGAGGTgaaatCTGTAAACCGAGGTGAGAC<br>GG   |
| 1-5bp-rev             | CCGTCTCACCTCGGTTTACAGatttcACCTC<br>TGTTTGGGAAAATTGGGGACGCCGAGAC<br>GA   |
| 1-6bp-for             | TCGTCTCGGCGTCCCCAATTTTCCCAAAC<br>AGAGGTcgaaatCTGTAAACCGAGGTGAGA<br>CGG  |
| 1-6bp-rev             | CCGTCTCACCTCGGTTTACAGatttcgACCTC<br>TGTTTGGGAAAATTGGGGACGCCGAGAC<br>GA  |
| 1-7bp-for             | TCGTCTCGGCGTCCCCAATTTTCCCAAAC<br>AGAGGTtcgaaatCTGTAAACCGAGGTGAGA<br>CGG |
| 1-7bp-rev             | CCGTCTCACCTCGGTTTACAGatttcgaACCT<br>CTGTTTGGGAAAATTGGGGACGCCGAGA<br>CGA |
| 2-0bp-for             | TCGTCTCGGAGGTTTTTGGAACCTCTGTTT                                          |

|           |                                                                       |
|-----------|-----------------------------------------------------------------------|
|           | GGGAAAATTGGGGAGTCTGAGACGG                                             |
| 2-0bp-rev | CCGTCTCAGACTCCCCAATTTTCCCAAAC<br>AGAGGTTCCAAAACCTCCGAGACGA            |
| 2-1bp-for | TCGTCTCGGAGGTTTTGGACACCTCTGTT<br>TGGGAAAATTGGGGAGTCTGAGACGG           |
| 2-1bp-rev | CCGTCTCAGACTCCCCAATTTTCCCAAAC<br>AGAGGTGTCCAAAACCTCCGAGACGA           |
| 2-2bp-for | TCGTCTCGGAGGTTTTGGACTACCTCTGT<br>TTGGGAAAATTGGGGAGTCTGAGACGG          |
| 2-2bp-rev | CCGTCTCAGACTCCCCAATTTTCCCAAAC<br>AGAGGTAGTCCAAAACCTCCGAGACGA          |
| 2-3bp-for | TCGTCTCGGAGGTTTTGGACTTACCTCTG<br>TTTGGGAAAATTGGGGAGTCTGAGACGG         |
| 2-3bp-rev | CCGTCTCAGACTCCCCAATTTTCCCAAAC<br>AGAGGTAAGTCCAAAACCTCCGAGACGA         |
| 2-4bp-for | TCGTCTCGGAGGTTTTGGACTTAACCTCT<br>GTTGGGAAAATTGGGGAGTCTGAGACG<br>G     |
| 2-4bp-rev | CCGTCTCAGACTCCCCAATTTTCCCAAAC<br>AGAGGTTAAGTCCAAAACCTCCGAGACGA        |
| 2-5bp-for | TCGTCTCGGAGGTTTTGGACTTAGACCTC<br>TGTTTGGGAAAATTGGGGAGTCTGAGACG<br>G   |
| 2-5bp-rev | CCGTCTCAGACTCCCCAATTTTCCCAAAC<br>AGAGGTCTAAGTCCAAAACCTCCGAGACG<br>A   |
| 2-6bp-for | TCGTCTCGGAGGTTTTGGACTTAGCACCT<br>CTGTTTGGGAAAATTGGGGAGTCTGAGAC<br>GG  |
| 2-6bp-rev | CCGTCTCAGACTCCCCAATTTTCCCAAAC<br>AGAGGTGCTAAGTCCAAAACCTCCGAGAC<br>GA  |
| 2-7bp-for | TCGTCTCGGAGGTTTTGGACTTAGCTACC<br>TCTGTTTGGGAAAATTGGGGAGTCTGAGA<br>CGG |
| 2-7bp-rev | CCGTCTCAGACTCCCCAATTTTCCCAAAC<br>AGAGGTAGCTAAGTCCAAAACCTCCGAGA<br>CGA |
| 4-0bp-for | TCGTCTCTGCACCCCCAATTTTCCCAAAC<br>AGAGGTCTGTAAACCGATGAGACGG            |
| 4-0bp-rev | CCGTCTCATCGGTTTACAGACCTCTGTTT<br>GGGAAAATTGGGGGTGCAGAGACGA            |
| 4-1bp-for | TCGTCTCTGCACCCCCAATTTTCCCAAAC<br>AGAGGTtCTGTAAACCGATGAGACGG           |
| 4-1bp-rev | CCGTCTCATCGGTTTACAGaACCTCTGTTT<br>GGGAAAATTGGGGGTGCAGAGACGA           |

|           |                                                                       |
|-----------|-----------------------------------------------------------------------|
| 4-2bp-for | TCGTCTCTGCACCCCAATTTTCCCAAAC<br>AGAGGTatCTGTAAACCGATGAGACGG           |
| 4-2bp-rev | CCGTCTCATCGGTTTACAGatACCTCTGTT<br>TGGGAAAATTGGGGGTGCAGAGACGA          |
| 4-3bp-for | TCGTCTCTGCACCCCAATTTTCCCAAAC<br>AGAGGTaatCTGTAAACCGATGAGACGG          |
| 4-3bp-rev | CCGTCTCATCGGTTTACAGattACCTCTGTT<br>TGGGAAAATTGGGGGTGCAGAGACGA         |
| 4-4bp-for | TCGTCTCTGCACCCCAATTTTCCCAAAC<br>AGAGGTaaatCTGTAAACCGATGAGACGG         |
| 4-4bp-rev | CCGTCTCATCGGTTTACAGatttACCTCTGT<br>TTGGGAAAATTGGGGGTGCAGAGACGA        |
| 4-5bp-for | TCGTCTCTGCACCCCAATTTTCCCAAAC<br>AGAGGTgaaatCTGTAAACCGATGAGACGG        |
| 4-5bp-rev | CCGTCTCATCGGTTTACAGatttcACCTCTGT<br>TTGGGAAAATTGGGGGTGCAGAGACGA       |
| 4-6bp-for | TCGTCTCTGCACCCCAATTTTCCCAAAC<br>AGAGGTcgaatCTGTAAACCGATGAGACG<br>G    |
| 4-6bp-rev | CCGTCTCATCGGTTTACAGatttcgACCTCTG<br>TTTGGGAAAATTGGGGGTGCAGAGACGA      |
| 4-7bp-for | TCGTCTCTGCACCCCAATTTTCCCAAAC<br>AGAGGTtcgaaatCTGTAAACCGATGAGACG<br>G  |
| 4-7bp-rev | CCGTCTCATCGGTTTACAGatttcgaACCTCT<br>GTTTGGGAAAATTGGGGGTGCAGAGACG<br>A |
| 5-0bp-for | TCGTCTCGCCGAGGTTTTGGAACCTCTGT<br>TTGGGAAAATTGGGGCTCGTGAGACGG          |
| 5-0bp-rev | CCGTCTCACGAGCCCAATTTTCCCAAAC<br>AGAGGTTCCAAAACCTCGGCGAGACGA           |
| 5-1bp-for | TCGTCTCGCCGAGGTTTTGGACACCTCTG<br>TTTGGGAAAATTGGGGCTCGTGAGACGG         |
| 5-1bp-rev | CCGTCTCACGAGCCCAATTTTCCCAAAC<br>AGAGGTGTCCAAAACCTCGGCGAGACGA          |
| 5-2bp-for | TCGTCTCGCCGAGGTTTTGGACTACCTCT<br>GTTTGGGAAAATTGGGGCTCGTGAGACG<br>G    |
| 5-2bp-rev | CCGTCTCACGAGCCCAATTTTCCCAAAC<br>AGAGGTAGTCCAAAACCTCGGCGAGACG<br>A     |
| 5-3bp-for | TCGTCTCGCCGAGGTTTTGGACTTACCTC<br>TGTTTGGGAAAATTGGGGCTCGTGAGACG<br>G   |
| 5-3bp-rev | CCGTCTCACGAGCCCAATTTTCCCAAAC<br>AGAGGTAAGTCCAAAACCTCGGCGAGAC          |

|                                    |                                                                          |
|------------------------------------|--------------------------------------------------------------------------|
|                                    | GA                                                                       |
| 5-4bp-for                          | TCGTCTCGCCGAGGTTTTGGACTTAACCT<br>CTGTTTGGGAAAATTGGGGCTCGTGAGAC<br>GG     |
| 5-4bp-rev                          | CCGTCTCACGAGCCCCAATTTTCCCAAAC<br>AGAGGTTAAGTCCAAAACCTCGGCGAGAC<br>GA     |
| 5-5bp-for                          | TCGTCTCGCCGAGGTTTTGGACTTAGACC<br>TCTGTTTGGGAAAATTGGGGCTCGTGAGA<br>CGG    |
| 5-5bp-rev                          | CCGTCTCACGAGCCCCAATTTTCCCAAAC<br>AGAGGTCTAAGTCCAAAACCTCGGCGAGA<br>CGA    |
| 5-6bp-for                          | TCGTCTCGCCGAGGTTTTGGACTTAGCAC<br>CTCTGTTTGGGAAAATTGGGGCTCGTGAG<br>ACGG   |
| 5-6bp-rev                          | CCGTCTCACGAGCCCCAATTTTCCCAAAC<br>AGAGGTGCTAAGTCCAAAACCTCGGCGA<br>GACGA   |
| 5-7bp-for                          | TCGTCTCGCCGAGGTTTTGGACTTAGCTA<br>CCTCTGTTTGGGAAAATTGGGGCTCGTGA<br>GACGG  |
| 5-7bp-rev                          | CCGTCTCACGAGCCCCAATTTTCCCAAAC<br>AGAGGTAGCTAAGTCCAAAACCTCGGCGA<br>GACGA  |
| 1-Chr10--54913298-54913376-<br>for | TCGTCTCGGCGTCCCCTCCCATCACAGGC<br>CCTGAGGTTTAAAGAGAAAACCTGAGACGG          |
| 1-Chr10-54913298-54913376-<br>rev  | CCGTCTCAGGTTTTCTCTTAAACCTCAGG<br>GCCTGTGATGGGAGGGGACGCCGAGACG<br>A       |
| 2-Chr10--54913298-54913376-<br>for | TCGTCTCGAACCATGGTTTTGTGGGCCAG<br>GCCCATGACCCTTCTCCTCTGGGAGTCTG<br>AGACGG |
| 2-Chr10--54913298-54913376-<br>rev | CCGTCTCAGACTCCCAGAGGAGAAGGGT<br>CATGGGCCTGGCCCACAAAACCATGGTTC<br>GAGACGA |
| 4-Chr10-54913298-54913376-<br>for  | TCGTCTCTGCACCCCCTCCCATCACAGGC<br>CCTGAGGTTTAAAGAGAAAACCATTGAGAC<br>GG    |
| 4-Chr10-54913298-54913376-<br>rev  | CCGTCTCAATGGTTTTCTCTTAAACCTCAG<br>GGCCTGTGATGGGAGGGGGTGCAGAGAC<br>GA     |
| 5-Chr10-54913298-54913376-<br>for  | TCGTCTCGCCATGGTTTTGTGGGCCAGGC<br>CCATGACCCTTCTCCTCTGGGCTCGTGAG<br>ACGG   |

|                                   |                                                                                                                                                      |
|-----------------------------------|------------------------------------------------------------------------------------------------------------------------------------------------------|
| 5-Chr10-54913298-54913376-<br>rev | CCGTCTCACGAGCCCAGAGGAGAAGGGT<br>CATGGGCCTGGCCACAAAACCATGGCG<br>AGACGA                                                                                |
| 3-for                             | ATCCGTCTCCAGTCGAGTCGGATTTGATC<br>TGATCAAGAGACAG                                                                                                      |
| 3-rev                             | AACCGTCTCGGTGCGTTCGGATTTGATCC<br>AGACATGATAAGATAC                                                                                                    |
| Esp3I-insert-for                  | /Phos/CGCGTTGAGACGCTGCCATCCGTCT<br>CGC                                                                                                               |
| Esp3I-insert-rev                  | /Phos/TCGAGCGAGACGGATGGCAGCGTC<br>TCAA                                                                                                               |
| Centromere_Chr_1_5_19-1_2*        | GTTGTTTCGTCTCGGCGTCCTTGTGTTGTG<br>TGTCTTCAACTCACAGAGTTAAACGATGCT<br>TTACACAGAGTAGACTTGAAACACTCTTTT<br>TCTGGAGTCTGAGACGGTTCTGTTTTGGT<br>GTGATTAGTTAT  |
| Centromere_Chr_1_5_19-4_5*        | GTTGGTCGTCTCTGCACCCTTGTGTTGTG<br>TGTCTTCAACTCACAGAGTTAAACGATGCT<br>TTACACAGAGTAGACTTGAAACACTCTTTT<br>TCTGGCTCGTGAGACGGTTCTGTTTTGGT<br>GTGATTAGTTAT   |
| Ch5_155183064-155183141-<br>1_2*  | GTTGTTTCGTCTCGGCGTCCCACCGGCTCA<br>TGAGAGGTAGAGCTAAGGTCCAAACCTAG<br>GTTTATCTGAGACCGGAACTCATGTGATT<br>AACTGTGGAGTCTGAGACGGTTCTGTTTT<br>GGTGTGATTAGTTAT |
| Ch5_155183064-155183141-<br>4_5*  | GTTGGTCGTCTCTGCACCCACCGGCTCA<br>TGAGAGGTAGAGCTAAGGTCCAAACCTAG<br>GTTTATCTGAGACCGGAACTCATGTGATT<br>AACTGTGGCTCGTGAGACGGTTCTGTTTT<br>GGTGTGATTAGTTAT   |
| Ch5_169395198-169395274-<br>1_2*  | GTTGTTTCGTCTCGGCGTCCTTAAGAACAT<br>AAATCCCAGGAATTCACAGAAACCTTGG<br>TTTGAGCTTTGGATTTCCCGCAGGATGTG<br>GGATAGGAGTCTGAGACGGTTCTGTTTTG<br>GTGTGATTAGTTAT   |
| Ch5_169395198-169395274-<br>4_5*  | GTTGGTCGTCTCTGCACCCTTAAGAACAT<br>AAATCCCAGGAATTCACAGAAACCTTGG<br>TTTGAGCTTTGGATTTCCCGCAGGATGTG<br>GGATAGGCTCGTGAGACGGTTCTGTTTTG<br>GTGTGATTAGTTAT    |



|                                    |                                                                                                                                                     |
|------------------------------------|-----------------------------------------------------------------------------------------------------------------------------------------------------|
| Ch12_62418577-62418652-<br>1_2*    | GTTGTTTCGTCTCGGCGTCCACTCCCTCTC<br>CCCCAAAAAGTAAAGGTAGAAAACCAAGG<br>TTTACAGGCAACAAATAGCACAATGAATG<br>GAATGGAGTCTGAGACGGTTCTGTTTTGG<br>TGTGATTAGTTAT  |
| Ch12_62418577-62418652-<br>4_5*    | GTTGGTCGTCTCTGCACCCACTCCCTCTC<br>CCCCAAAAAGTAAAGGTAGAAAACCAAGG<br>TTTACAGGCAACAAATAGCACAATGAATG<br>GAATGGCTCGTGAGACGGTTCTGTTTTGG<br>TGTGATTAGTTAT   |
| chr13_102010574-102010650-<br>1_2* | GTTGTTTCGTCTCGGCGTCCTAGGGAAGTG<br>ATCATAGCTGAGTTTCTGGAAAAACCTAG<br>GTTTTAAAGTTGAGGAGACTTAAGTCCAAA<br>ACCTGGAGTCTGAGACGGTTCTGTTTTGG<br>TGTGATTAGTTAT |
| chr13_102010574-102010650-<br>4_5* | GTTGGTCGTCTCTGCACCCTAGGGAAGTG<br>ATCATAGCTGAGTTTCTGGAAAAACCTAG<br>GTTTTAAAGTTGAGGAGACTTAAGTCCAAA<br>ACCTGGCTCGTGAGACGGTTCTGTTTTGG<br>TGTGATTAGTTAT  |

Oligonucleotide sequences were annealed to create the fragments shown in Figure 1. The names correspond to the fragment number (1, 2, 4, or 5) and then to the number of base pair spacer nucleotides separating the Cas9 binding site from the gix pseudo site.

\* Double stranded gBlocks as described in the methods within the supporting material document.

**Table S3. Oligonucleotides for recCas9 construction**

| <b>Oligonucleotide Name</b> | <b>Sequence</b>                                                                                                    |
|-----------------------------|--------------------------------------------------------------------------------------------------------------------|
| 1GGS-link-for_BamHI         | TTCATCGGATCCGATAAAAAGTATTCTA<br>TTGGTTTAGCTATCGGCAC                                                                |
| 5GGS-link-for_BamHI         | TTCATCGGATCCGGTGGTTCAGGTGGC<br>AGCGGAG                                                                             |
| 8GGS-link-for_BamHI         | TTCATCGGATCCGGAGGGTCCGGAGGT<br>AGTGGCGGCAGCGGTGGTTCAGGTGG<br>CAGCGGAG                                              |
| Cas9-rev-FLAG-NLS-AgeI      | AATAACCGGTTTCAGACCTTCCTTTTCTT<br>CTTTGGGGAACCTCCCTTGTTCGTCATCA<br>TCCTTATAATCGGAGCCACCGTCACCC<br>CCAAGCTGTGACAAATC |
| 1GGS-rev-BamHI              | TGATAAGGATCCACCCTTTGGTGGTCTT<br>CCAACCGCC                                                                          |
| 2GGS-rev-BamH               | TGATAAGGATCCACCGCTACCACCCTTT<br>GGTGGTCTTC                                                                         |
| Gin-for_NotI                | AGATCCGCGGCCGCTAATAC                                                                                               |
| Esp3I-for-plasmid           | TTGAGTcgtctcTATACTCTTCCTTTTTCAA<br>TATTATTGAAGCATTATCAGGG                                                          |
| Esp3I-rev-plasmid           | CTGGAACgtctcACTGTCAGACCAAGTTTA<br>CTCATATATACTTTAGATTG                                                             |
| spec-Esp3I-for              | GGTGTGcgtctcTACAGTTATTTGCCGACT<br>ACCTTGGTGATCTCGC                                                                 |
| spec-Esp3I-rev              | ACACCAcgtctcTGTATGAGGGAAGCGGT<br>GATCGCC                                                                           |
| cpec assembly-for-plasmid   | CATACTCTTCCTTTTTCAATATTATTGAA<br>GCATTTATCAGGG                                                                     |
| cpec assembly-rev-plasmid   | CTGTCAGACCAAGTTTACTCATATATAC<br>TTTAGATTG                                                                          |
| cpec assembly-for-spec      | CAATCTAAAGTATATATGAGTAAACTTG<br>GTCTGACAGTTTGGCGACTACCTTGGT<br>GATCTCG                                             |
| cpec assembly-for-spec2     | CAATCTAAAGTATATATGAGTAAACTTG<br>GTCTGACAGTTATTTGCCGACTACCTTG<br>GTGATCTCG                                          |
| cpec assembly-rev-spec      | CCCTGATAAATGCTTCAATAATATTGAA<br>AAAGGAAGAGTATG                                                                     |

**Table S4. Custom sequencing oligonucleotides.**

| <b>Oligonucleotide Name</b> | <b>Sequence</b>       |
|-----------------------------|-----------------------|
| Fwd CMV                     | CGCAAATGGGCGGTAGGCGTG |
| Cas9coRevE1                 | CCGTGATGGATTGGTGAATC  |
| Cas9coRevE2                 | CCCATACGATTTCACCTGTC  |
| Cas9coRevE3                 | GGGTATTTTCCACAGGATGC  |
| Cas9coRevE4                 | CTTAGAAAGGCGGGTTTACG  |
| Cas9coRevE5                 | CTTACTAAGCTGCAATTTGG  |
| Cas9coRevE6                 | TGTATTCATCGGTTATGACAG |
| bGH_PArev seq1              | CAGGGTCAAGGAAGGCACG   |
| pHU6-gRNA_for               | GTTCCGCGCACATTTCC     |
| pHU6-gRNA_rev               | GCGGAGCCTATGGAAAAAC   |
| pCALNL-for1                 | GCCTTCTTCTTTTTCTACAGC |
| pCALNL-for2                 | CGCATCGAGCGAGCAC      |

**Table S5. Genomic PCR primers.**

| <b>Oligonucleotide Name</b> | <b>Sequence</b>               |
|-----------------------------|-------------------------------|
| <b>FAM19A2-F1</b>           | TCAAGTAGCAAAAGAAGTAGGAGTCAG   |
| <b>FAM19A2-F2</b>           | TTAGATGCATTCGTGCTTGAAG        |
| <b>FAM19A2-C1</b>           | TTAATTTCTGCTGCTAGAACTAAATCTGG |
| <b>FAM19A2-R1</b>           | GGGAAGAAAAGCTGGATGGAGAATG     |
| <b>FAM19A2-R2</b>           | CATAAATGACCTAGTGGAGCTG        |
| <b>FAM19A2-C2</b>           | TGGTTATTTTGCCATTAGTTGATGC     |

**Table S6. List of target sites sequences used in reporter assays.**

| <b>Target site name</b>          | <b>Sequence</b>                                                                                   |
|----------------------------------|---------------------------------------------------------------------------------------------------|
| PAM_NT1-0bp-gix_core-0bp-NT1_PAM | <b>CCCCAATTTTCCCAAACAGAGGTtCTGTAAACCGA<br/>GGTTTTGGAACCTCTGTTTGGGAAAATTGGGG</b>                   |
| PAM_NT1-1bp-gix_core-1bp-NT1_PAM | <b>CCCCAATTTTCCCAAACAGAGGTtCTGTAAACCGA<br/>GGTTTTGGcAACCTCTGTTTGGGAAAATTGGGG</b>                  |
| PAM_NT1-2bp-gix_core-2bp-NT1_PAM | <b>CCCCAATTTTCCCAAACAGAGGTatCTGTAAACCG<br/>AGGTTTTGGctAACCTCTGTTTGGGAAAATTGGGG</b>                |
| PAM_NT1-3bp-gix_core-3bp-NT1_PAM | <b>CCCCAATTTTCCCAAACAGAGGTaatCTGTAAACC<br/>GAGGTTTTGGcttAACCTCTGTTTGGGAAAATTGG<br/>GG</b>         |
| PAM_NT1-4bp-gix_core-4bp-NT1_PAM | <b>CCCCAATTTTCCCAAACAGAGGTaaatCTGTAAAC<br/>CGAGGTTTTGGcttaAACCTCTGTTTGGGAAAATTG<br/>GGG</b>       |
| PAM_NT1-5bp-gix_core-5bp-NT1_PAM | <b>CCCCAATTTTCCCAAACAGAGGTgaaatCTGTAAAC<br/>CGAGGTTTTGGcttagAACCTCTGTTTGGGAAAATT<br/>GGGG</b>     |
| PAM_NT1-6bp-gix_core-6bp-NT1_PAM | <b>CCCCAATTTTCCCAAACAGAGGTcgaaatCTGTAAA<br/>CCGAGGTTTTGGcttagcAACCTCTGTTTGGGAAAA<br/>TTGGGG</b>   |
| PAM_NT1-7bp-gix_core-7bp-NT1_PAM | <b>CCCCAATTTTCCCAAACAGAGGTtcgaaatCTGTAAA<br/>CCGAGGTTTTGGcttagctAACCTCTGTTTGGGAAAA<br/>TTGGGG</b> |
| PAM_NT1-6bp-gix_core-0bp-NT1_PAM | <b>CCCCAATTTTCCCAAACAGAGGTtcgaaatCTGTAAA<br/>CCGAGGTTTTGGAACCTCTGTTTGGGAAAATTGG<br/>GG</b>        |
| PAM_NT1-6bp-gix_core-1bp-NT1_PAM | <b>CCCCAATTTTCCCAAACAGAGGTtcgaaatCTGTAAA<br/>CCGAGGTTTTGGcAACCTCTGTTTGGGAAAATTG<br/>GGG</b>       |
| PAM_NT1-6bp-gix_core-2bp-NT1_PAM | <b>CCCCAATTTTCCCAAACAGAGGTtcgaaatCTGTAAA<br/>CCGAGGTTTTGGctAACCTCTGTTTGGGAAAATTG<br/>GGG</b>      |
| PAM_NT1-6bp-gix_core-4bp-NT1_PAM | <b>CCCCAATTTTCCCAAACAGAGGTtcgaaatCTGTAAA<br/>CCGAGGTTTTGGcttaAACCTCTGTTTGGGAAAATT<br/>GGGG</b>    |
| PAM_NT1-6bp-gix_core-5bp-NT1_PAM | <b>CCCCAATTTTCCCAAACAGAGGTtcgaaatCTGTAAA<br/>CCGAGGTTTTGGcttagAACCTCTGTTTGGGAAAAT<br/>TGGGG</b>   |
| PAM_NT1-0bp-gix_core-6bp-NT1_PAM | <b>CCCCAATTTTCCCAAACAGAGGTCTGTAAACCGA<br/>GGTTTTGGcttagcAACCTCTGTTTGGGAAAATTGG<br/>GG</b>         |
| PAM_NT1-1bp-gix_core-6bp-NT1_PAM | <b>CCCCAATTTTCCCAAACAGAGGTtCTGTAAACCGA<br/>GGTTTTGGcttagcAACCTCTGTTTGGGAAAATTGG<br/>GG</b>        |
| PAM_NT1-2bp-gix_core-            | <b>CCCCAATTTTCCCAAACAGAGGTatCTGTAAACCG</b>                                                        |

|                                           |                                                                                                                                           |
|-------------------------------------------|-------------------------------------------------------------------------------------------------------------------------------------------|
| 6bp-NT1_PAM                               | <u>AGGTTTTGG</u> <u>GcttagcAACCTCTGTTTGGGAAAATTG</u><br><b>GGG</b>                                                                        |
| PAM_NT1-3bp-gix_core-6bp-NT1_PAM          | <b><i>CCCCAATTTTCCCAAACAGAGGTaat</i></b> <u>CTGTAAACC</u><br><u>GAGGTTTTGG</u> <u>GcttagcAACCTCTGTTTGGGAAAATT</u><br><b>GGGG</b>          |
| PAM_NT1-4bp-gix_core-6bp-NT1_PAM          | <b><i>CCCCAATTTTCCCAAACAGAGGTaaat</i></b> <u>CTGTAAAC</u><br><u>CGAGGTTTTGG</u> <u>GcttagcAACCTCTGTTTGGGAAAAT</u><br><b>TGGGG</b>         |
| PAM_NT1-5bp-gix_core-6bp-NT1_PAM          | <b><i>CCCCAATTTTCCCAAACAGAGGTgaaat</i></b> <u>CTGTAAAC</u><br><u>CGAGGTTTTGG</u> <u>GcttagcAACCTCTGTTTGGGAAAAT</u><br><b>TGGGG</b>        |
| Chromosome_10-54913298-54913376*          | <b><i>CCCCTCCCATCACAGGCCCTGAGgtttaa</i></b> <u>GAGAAAA</u><br><u>CCATGGTTTTGTG</u> <u>ggccagGCCCATGACCCTTCTC</u><br><u>CTCTGGG</u>        |
| Centromere_Chromosomes_1_5_19             | <b><i>CCTTGTGTTGTGTGTCTTCAACTcacag</i></b> <u>AGTTAAAC</u><br><u>GATGCTTTACACagagta</u> <u>GACTTGAAACACTCTTTTT</u><br><b>CTGG</b>         |
| Chromosome_5_155183064-155183141 (site 1) | <b><i>CCACCGGCTCATGAGAGGTAGAGctaag</i></b> <u>GTCCAAA</u><br><u>CCTAGGTTTATCT</u> <u>gagaccGGA</u> <u>ACTCATGTGATTAA</u><br><b>CTGTGG</b> |
| Chromosome_5_169395198-169395274 (site 2) | <b><i>CCTTAAGAACATAAATCCCCAGGaattc</i></b> <u>ACAGAAAC</u><br><u>CTTGGTTTGAGC</u> <u>tttgaTTTCCCGCAGGATGTGGG</u><br><b>ATAGG</b>          |
| Chromosome_12_62418577-62418652           | <b><i>CCACTCCCTCTCCCCAAAAAGTaaagg</i></b> <u>TAGAAAA</u><br><u>CCAAGGTTTACAG</u> <u>gcaacAAATAGCACAATGAATG</u><br><b>GAATGG</b>           |
| Chromosome_13_102010574-102010650 (FGF14) | <b><i>CCTAGGGAAGTGATCATAGCTGAgtttct</i></b> <u>GGAAAAAC</u><br><u>CTAGGTTTTAA</u> <u>gttgaGGAGACTTAAGTCCAAAAC</u><br><b>CTGG</b>          |

Protoadjacent spacer motifs (PAMs) are in bold. Base pair spacers are lower case. Gix site or pseudo sites are in italics and dCas9 binding sites are underlined.

\* Chromosome\_10 reporter contains two overlapping PAM sites and dCas9 binding sites on the 5' and 3' ends of the gix sites.

**Table S7. DNA sequences encoding GGS linkers.**

| <b>GGS linkers</b> | <b>DNA sequences for GGS linkers</b>                                                 |
|--------------------|--------------------------------------------------------------------------------------|
| 2XGGS              | GGTGGTAGCGGTGGATCC                                                                   |
| 5XGGS              | GGTGGATCCGGTGGTTCAGGTGG<br>CAGCGGAGGGTCAGGAGGCTCT                                    |
| 8XGGS              | GGTGGATCCGGAGGGTCCGGAGG<br>TAGTGGCGGCAGCGGTGGTTCAG<br>GTGGCAGCGGAGGGTCAGGAGGC<br>TCT |

**Table S8. List of gRNA sequences.**

| <b>gRNA name</b>                                          | <b>gRNA-sequence</b>  |
|-----------------------------------------------------------|-----------------------|
| on-target_gRNA                                            | ACCTCTGTTTGGGAAAATTG  |
| non-target_gRNA                                           | gCACACTAGTTAGGGATAACA |
| Chromosome_10-54913298-54913376_gRNA-rev-5                | gCCTCAGGGCCTGTGATGGGA |
| Chromosome_10-54913298-54913376_gRNA-rev-6                | gCTCAGGGCCTGTGATGGGAG |
| Chromosome_10-54913298-54913376_gRNA-for-5                | GGCCCATGACCCTTCTCCTC  |
| Chromosome_10-54913298-54913376_gRNA-for-6                | GCCCATGACCCTTCTCCTCT  |
| Centromere_Chromosomes_1_5_19-gRNA-for                    | GACTTGAAACACTCTTTTTTC |
| Centromere_Chromosomes_1_5_19-gRNA-rev                    | gAGTTGAAGACACACAACACA |
| Chromosome_5_155183064-155183141_(site 1)_gRNA-for        | GGAACTCATGTGATTAAGTG  |
| Chromosome_5_155183064-155183141_(site 1)_gRNA-rev        | gTCTACCTCTCATGAGCCGGT |
| Chromosome_5_169395198-169395274_(site 2)_gRNA-for        | gTTTCCCGCAGGATGTGGGAT |
| Chromosome_5_169395198-169395274_(site 2)_gRNA-rev        | gCCTGGGGATTTATGTTCTTA |
| Chromosome_12_62418577-62418652_gRNA-for                  | gAAATAGCACAATGAATGGAA |
| Chromosome_12_62418577-62418652_gRNA-rev                  | gACTTTTTGGGGGAGAGGGAG |
| Chromosome_13_102010574-102010650_(FGF14)_gRNA-for        | GGAGACTTAAGTCCAAAACC  |
| Chromosome_13_102010574-102010650_(FGF14)_gRNA-rev        | gTCAGCTATGATCACTTCCT  |
| <b>Off target-for (CLTA)</b>                              | GCAGATGTAGTGTTCCACA   |
| <b>Off target-rev(VEGF)</b>                               | GGGTGGGGGGAGTTTGCTCC  |
| <b>Chromosome_12_62098359-62098434_(FAM19A2)_gRNA-rev</b> | gATATCCGTTTATCAGTGTC  |
| <b>Chromosome_12_62098359-62098434_(FAM19A2)_gRNA-for</b> | gTTCCTAAGCTTGGGCTGCAG |
| <b>Chromosome_12_62112591-62112668_(FAM19A2)_gRNA-rev</b> | gCCTAAAAGTGACTGGGAGAA |
| <b>Chromosome_12_62112591-62112668_(FAM19A2)_gRNA-for</b> | gCACAGTCCCATATTTCTTGG |



**Table S9. recCas9 genomic targets identified *in silico***

| Chr. | Start     | End       | Sequence                                                                            | Pattern ID |
|------|-----------|-----------|-------------------------------------------------------------------------------------|------------|
| chr1 | 34169027  | 34169103  | CCTTTAGTGAAAAGTAGACAGCTCTGAATATGAAAGGTAGGTTT<br>TCATTTCTGGGAAAGAGACGCCAAGTGATGTGG   | 2          |
| chr1 | 51006703  | 51006780  | CCTCCAATAAATATGGGACTATGTGGAAAGACCAAACCTACGTT<br>TGATTGGTGTACCTGAAAGTGACGGGAAGAATGG  | 1          |
| chr1 | 89229373  | 89229450  | CCATTCTGCCCGTCACTTTTCAGGTACACCAATCAAACGTAGGTT<br>TAGTCTTTTTCACATAGTCCCATATTTCTTGAGG | 1          |
| chr1 | 115638077 | 115638154 | CCATTCTCCCGTCACTTTTCAGGTACAACAATCAAACGTAGGTT<br>TGGTCTTTTTCACATAGTCCCATATTTCTTGAGG  | 1          |
| chr1 | 122552402 | 122552478 | CCTTGTAGTGTGTGATTCAACTCACAGAGTTAAACGATCCTTT<br>ACACAGAGCAGACTTGAACACTCTTTTGTGG      | 2          |
| chr1 | 122609874 | 122609950 | CCTTGTAGTGTGTGATTCAACTCACAGAGTTAAACGATCCTTT<br>ACACAGAGCATACTTGAACACTCTTTTGTGG      | 2          |
| chr1 | 122668677 | 122668753 | CCTTGTGTGTGTGATTCAACTCACAGAGTTAAACGATCCTTT<br>ACACAGAGCAGACTTGAACACTCTTTTGTGG       | 2          |
| chr1 | 123422419 | 123422495 | CCTTGTGTGTGTGTTTATTCAACTCACAGAGTTAAACGATCCTTT<br>ACACAGAGCAGACTTGAATACTCTTTTGTGG    | 2          |
| chr1 | 123648614 | 123648690 | CCTTGTAGTGTGTGATTCAACTCACAGAGTTAAACGATCCTTT<br>ACACAGAGCATACTTGAACACTCTTTTGTGG      | 2          |
| chr1 | 123806335 | 123806411 | CCTTGTATTGTGAGTATTCAACTCACAGAGTTAAACGATCCTTT<br>ACACAGAGCAGACTTGAACACTCTTTTGTGG     | 2          |
| chr1 | 124078228 | 124078304 | CCTTGTGTGTGTGTCTTCAACTCACAGAGTTAAACGATGCTTT<br>ACACAGAGTAGACTTGAACACTCTTTTCTGG      | 2          |
| chr1 | 124231074 | 124231150 | CCTTGTGTGTGTGATTCAACTCACAGAGTTAAACGATCCTTT<br>ACACAGAGCAGACTTGTAACTCTTTTGTGG        | 2          |
| chr1 | 124232435 | 124232511 | CCTTGTGTGTGTGATTCAACTCACAGAGTTAAACGATCCTTT<br>ACACAGAGCAGACTTGAACACTCTTTTGTGG       | 2          |
| chr1 | 124344781 | 124344857 | CCTTGTGTGTGTGATTCAACTCACAGAGTTAAACGATCCTTT<br>ACACAGAGCAGACTTGAACACTCTTTTGTGG       | 2          |
| chr1 | 124435716 | 124435792 | CCTTGTGTGTGTGATTCAACTCACAGAGTTAAACGATCCTTT<br>ACACAGAGGAGACTTGTAACTCTTTTGTGG        | 2          |
| chr1 | 158677186 | 158677262 | CCTGAGGTTTTCCAGGTTTTAAAAGGAAACCTAAAGGTAGGTTT<br>AGCATTAAAGTGTCTTGAAGTTATTTTAAAAGG   | 2          |
| chr1 | 167629479 | 167629554 | CCAAAATCCCACAAAACCGAATGCATCAGTCAAAGCAAGGTTT<br>GAAGAAAAGATTTACCACCTCAGGGAGCTTGG     | 4          |
| chr1 | 167783428 | 167783504 | CCTTTTCTGGATATCGTTGATGCTCTGTATGCAAAGGTAGGTT<br>TTGGGTTATGTTGTTAAACAGTGATTGAATGG     | 3          |
| chr1 | 169409367 | 169409444 | CCTCCAAGAAATATGGGACTATGTGAAAAGACCAAACCTACGTT<br>TGATTGGTGTACCTGAAAGTGACAGAGAGAATGG  | 1          |
| chr1 | 174145346 | 174145423 | CCTCCAAGAAATATGGGACTATGTGAGAAGACCAAACCTACGTT<br>TGATTGGTGTACCTGAAAGTGATGGGGAGAATGG  | 1          |
| chr1 | 183750168 | 183750245 | CCATTCTCCCATCGCTTTTCAGGTACACCAATCAAACGTAGGTT<br>TGGTCTTTTTCACATAGTCCCATATTTCTTGAGG  | 1          |
| chr1 | 200801540 | 200801617 | CCATTCTCCCATCACTTTTCAGGTGTACCGATCAAACGTAGGTT<br>TGGTCTTTTTCACATAGTCCCATATTTCTTGAGG  | 1          |
| chr1 | 207589936 | 207590013 | CCTCCAAGAAATATGGGACTATGTGAAAAGACCAAACCTACGTT<br>TGATTGGTGTACCTGAAAGTGACGGGGAGAATGG  | 1          |
| chr1 | 209768370 | 209768445 | CCTTCAGGGCAGAAACAGCTCTACTAGCAGAGAAAGCAAGCTTT<br>CAATATTGTGCAATACAAAACGAGAGCAGGG     | 4          |
| chr1 | 218652378 | 218652455 | CCATTCTCCTCATCTCCTTCTGGTACTCCAATCAAACGTAGGTT<br>TGGTCTTTTCTCATAGTCTCATATTTCTTGAGG   | 1          |
| chr1 | 222147250 | 222147327 | CCTCCAAGACATATAGGACTATGTGAAAATACCAAACCTACGTT<br>TGATTGGTGTACCTGAAAGTGACAGGGAGTATGG  | 1          |
| chr1 | 245870710 | 245870785 | CCTGCCAGATACCAGTAGTCACTGTGAATTACAAAGCTACGTTT<br>CTTCCATAGGGAAAAGTTTGGAGTCCAGCCAGG   | 4          |
| chr2 | 2376037   | 2376114   | CCATTCTCCCTGTCCTTTTCAGGTACACCAATCAAACGTAGGTT<br>TGGTCTTTTTCACATAGTCCCATATTTCTTGAGG  | 1          |

|      |           |           |                                                                                       |   |
|------|-----------|-----------|---------------------------------------------------------------------------------------|---|
| chr2 | 4119629   | 4119706   | CCATTCTCCCACCCTTTTTCAGGTACACCAATCAAACGTAGGTT<br>TGGTCTTTTTCACATAGTCCCATATTTCTTGTAGG   | 1 |
| chr2 | 4909047   | 4909124   | CCTAACCGAAACTAACTAATAGATATGGGCAGAAAGCATCCTT<br>TCACTTTTGTCTGGGAGAGGGAAGAAGCAAAGG      | 1 |
| chr2 | 28984877  | 28984953  | CCATTTTGGGGAGGCCTTGATGGGAAGCTGAAAAGGAAGCTTT<br>CCTCCCAGTCCCTGCTGAAAGCCTTGCCAGCTGG     | 2 |
| chr2 | 31755833  | 31755910  | CCTCCAAGAAACACAGGACTATGTGAAAAGATCAAACCTACGTT<br>TGATTGGTGTCTCTGAAAGTATGGGGAGAATGG     | 1 |
| chr2 | 39829583  | 39829660  | CCATTCTCTTCATGACTTTTTCAGGTACACCATTGAAACGTAGGTT<br>TGGTCTTTTTCACATTGTCCCATATTTCTTGGAGG | 1 |
| chr2 | 60205947  | 60206024  | CCATTCTCCCATCACTTTTTCAGGTACACCAATCAAACGTAGGTT<br>TGGTCTTTTTCACATAGTCCCGTATTTCTTGGTGG  | 1 |
| chr2 | 79082362  | 79082439  | CCATTCTCCCTGTCACTTTTTCAGGTACACCAATCAAACGTAGGTT<br>TGGTCTTTTTCACATAGTCCCATATTTCTTGGGGG | 1 |
| chr2 | 79082362  | 79082438  | CCATTCTCCCTGTCACTTTTTCAGGTACACCAATCAAACGTAGGTT<br>TGGTCTTTTTCACATAGTCCCATATTTCTTGGGGG | 3 |
| chr2 | 108430915 | 108430992 | CCTCCAAGAAATATGAGATTATATGAAAAGACCAAACCTACGTT<br>TGATTGGTGTACTTTAAAGTGACGGGGAGAATGG    | 1 |
| chr2 | 115893685 | 115893762 | CCATTCTCCCCTGCTATTTTTCAGGTACACCAATCAAACGTAGGTT<br>TGGTCTTTTTCACATAGTCCCAATTTCTTGGAGG  | 1 |
| chr2 | 119620068 | 119620145 | CCCCAAGAAATGTGGGACTATATGAAAAGACCAAACCTACGTT<br>TGACTGGTGTACCTAAAAGTATGGGGAGAATGG      | 1 |
| chr2 | 119620069 | 119620145 | CCCCAAGAAATGTGGGACTATATGAAAAGACCAAACCTACGTTT<br>GACTGGTGTACCTAAAAGTATGGGGAGAATGG      | 2 |
| chr2 | 128495068 | 128495144 | CCCATTGGTGTGACCAGATGGTGAAGGAGGCAAAGGTTGCTTT<br>GAATGACTGTGCTCTGGGGTGAGCCAGGCCTGG      | 2 |
| chr2 | 133133559 | 133133634 | CCCTTTACAGAGGTGAGCTTTGTTATTAGTAAAAAGGTAGGTTT<br>CCCTGTTTTTCTGAAGAAAAGCTGTGAGTGGG      | 4 |
| chr2 | 134174983 | 134175060 | CCACTGCCCATTGACAGAGTGGCGAGGTGGGTGAAACCTTGCTT<br>TCCTCCTGGCCCATGGGCAGGGTGGGGCTGTGGG    | 1 |
| chr2 | 134174983 | 134175059 | CCACTGCCCATTGACAGAGTGGCGAGGTGGGTGAAACCTTGCTT<br>TCCTCCTGGCCCATGGGCAGGGTGGGGCTGTGG     | 3 |
| chr2 | 138069945 | 138070022 | CCATTCTCCCTGTCACTTTTTCAGGTACACCAATCAAACGTAGGTT<br>TGGTCTTTTTCACATAGTCCCATATTTCTTGGAGG | 1 |
| chr2 | 138797420 | 138797496 | CCTCCAAGAAATATCAACTGTGTGAAAAGACGAAACCTACGTTT<br>GATTAATGTACCTGAAAGTGACAGGGAGAATGG     | 2 |
| chr2 | 145212434 | 145212511 | CCATTCTCCCATTAACCTTTCAAGTACACCAATCAAAGGTAGGTT<br>TGGTGTTTTCCCATAGTCCCGTATTTCTTGGAGG   | 1 |
| chr2 | 147837842 | 147837919 | CCTTTTTCATCATGCCCTTTTCACTTTAAGGTGAAAACCTTGCTT<br>TACATGTCAGAGAAAAGAAGAGCCCTCAGCTGGG   | 1 |
| chr2 | 147837842 | 147837918 | CCTTTTTCATCATGCCCTTTTCACTTTAAGGTGAAAACCTTGCTT<br>TACATGTCAGAGAAAAGAAGAGCCCTCAGCTGG    | 3 |
| chr2 | 154152540 | 154152617 | CCATTACCCCGTCACTTTTTCAGGTACACCAATCAAACGTAGGTT<br>TGGTCTTTTTCACATAGTCCCATATTTCTTGGAGG  | 1 |
| chr2 | 157705943 | 157706019 | CCTCCAAGAAATATGGGACTATGTGAAAAGACCAAACCTACGTT<br>TGATGGTGTACCCGAAAGTGACAGGGAGAATGG     | 3 |
| chr2 | 158361152 | 158361229 | CCACCAAGAAATATGGGACTATGTGAAAAGACCAAACCTACGTT<br>TGATAGGTATACCTGAAAGTGACAGGGAGAATGG    | 1 |
| chr2 | 161461006 | 161461083 | CCATTCTCCCATCACTTTTTCAGGTGCACCAATCAAACGTAGGTT<br>TGGTCTTTTTCACATAGTCCCATATTTCTTGGAGG  | 1 |
| chr2 | 179077376 | 179077453 | CCCTCAAGAAATATGAGACTATGTGAAAAGACCAAACCTACGTT<br>TGACTGGTATACCTGAAAGTGACAGGGAGAATGG    | 1 |
| chr2 | 179077377 | 179077453 | CCTCAAGAAATATGAGACTATGTGAAAAGACCAAACCTACGTTT<br>GACTGGTATACCTGAAAGTGACAGGGAGAATGG     | 2 |
| chr2 | 181090699 | 181090776 | CCTCCAACAAATATGGGACTATGTGAAAAGACCAAACCTACGTT<br>TGATTGGTGTACCTGAAAGTGACGGGGATAATGG    | 1 |
| chr2 | 182331957 | 182332034 | CCATTCTCTCCCTCACTTTTCAAGTACACCAATCAAACGTAGGTT<br>TGGTCTTTTTCACATAGTCTTATATTTCTTGGCGG  | 1 |
| chr2 | 183620562 | 183620638 | CCATTCTCCCTGTCACTGTCAGTACACCAATCAAACGTAGGTTT<br>GGTCTCTTTCACATAGTCCCATATTTCTTGGAGG    | 2 |
| chr2 | 207345927 | 207346003 | CCTCCAAGAAATATGGGACTATGTGAACAGACCAAACCTACGTT                                          | 3 |

|      |           |           |                                                                                      |   |
|------|-----------|-----------|--------------------------------------------------------------------------------------|---|
|      |           |           | TGATTGGTGTACCTGAAAGTGATGGCAGAATGG                                                    |   |
| chr2 | 216652047 | 216652123 | CCACCATGCTGGCCACCACACATTTTTTTCTAAAGCTTGGTTT<br>TGGCCACAGTGAGAGTTTCTTGGGCTGTCAGGG     | 2 |
| chr2 | 216652047 | 216652122 | CCACCATGCTGGCCACCACACATTTTTTTCTAAAGCTTGGTTT<br>TGGCCACAGTGAGAGTTTCTTGGGCTGTCAGG      | 4 |
| chr2 | 223780040 | 223780116 | CCCCTAGGTGGCGATATCTGAGGGTCCAATGAAACCATGCTTT<br>TTACTCAGATCTTCCACTAACCACCTCCCCGG      | 2 |
| chr2 | 224486595 | 224486672 | CCTCTAAGAAATATGGGACTATGTGAAAAGACCAAACCTACGTT<br>TGACTGGTGTACCTGAAAGTGACGGGGAGAATGG   | 1 |
| chr2 | 230526902 | 230526979 | CCTCCAAGAAATATGGGACTATGTGAAAAGACCAAACCTACGTT<br>TGATTAGTGTACCTGAAAGTGACGGGGAGAATGG   | 1 |
| chr2 | 232036127 | 232036204 | CCATTCTCCCTGTCACCTTTCAGGTACATCAATCAAACGTAGGTT<br>TGGTCTTTTCACATAGTCCCATATTTCTTGGAGG  | 1 |
| chr3 | 4072812   | 4072889   | CCTCCAAGAAATATGGGACTATGTGAAAAGACCAAACCTACGTT<br>TGACTGGTGTACCTGAAAGGGATGGGGAGAATGG   | 1 |
| chr3 | 9261677   | 9261754   | CCCCAAGAAATATGAGACTATGTGAAAAGACCAAACCTACGTT<br>TGATTGGTGTACCTGAAAGTGACAGGGAGAATGG    | 1 |
| chr3 | 9261678   | 9261754   | CCCCAAGAAATATGAGACTATGTGAAAAGACCAAACCTACGTT<br>GATTGGTGTACCTGAAAGTGACAGGGAGAATGG     | 2 |
| chr3 | 16732146  | 16732223  | CCTCTAAGAAATATGGGACTATGTGAAAAGACCAAACCTACGTT<br>TGATTGGTGTAACTGAAAGTGACAGGGAGAATGG   | 1 |
| chr3 | 17450712  | 17450789  | CCTCCAAGAAATATGCGCCTATGTGAAAAGACCAAACCTACGTT<br>TGATTGGTGTACCTGAAAGTGATGGAGAGAATGG   | 1 |
| chr3 | 21559769  | 21559846  | CCATTCTCCCTGTCACCTTTCAGGTACACCAATCAAACGTAGGTT<br>TGGTCTTTTCACATATTTCCCATATTTCTTGGAGG | 1 |
| chr3 | 23416658  | 23416735  | CCATTCTCCCGTCACTTTCAGGTACACCAACCAAACGTGGTT<br>TGGTCTTTTCACATAGTCCCATATTTCTTGGAGG     | 1 |
| chr3 | 29984019  | 29984096  | CCATTCTCCCTGTCACCTTTCAGGTACACCAATCAAACGTAGGTT<br>TGGTCTTTTCACATACTCCCATATTTCTTGGAGG  | 1 |
| chr3 | 38269551  | 38269627  | CCTGGCCTAAATTTTTAATTCTTAGTTTGAACCTTGGCTTT<br>TAGTGTGATGGCGCAAAAGCTGAGCTGAAAGG        | 2 |
| chr3 | 40515213  | 40515288  | CCAGTGCCTTTTGGTTTTAAAGGCAAGCCTCCAACCTTCCCTTT<br>CTCCTGGATGCTGTGGTGGTTGCCATGCATGG     | 4 |
| chr3 | 49233612  | 49233687  | CCCAACTCCTGCGAGAAGTAGCTCACCATGACAAAGCTACCTTT<br>GCTTTTATCGTTTTGCAAAACAAAAAGGGGG      | 4 |
| chr3 | 66292894  | 66292971  | CCATTCTCCCGTCACTTTCAGGTGTGCCAATCAAACGTAGGTT<br>TGGTCTTTTCACATAGTCCCATATTTCTTGGAGG    | 1 |
| chr3 | 67541493  | 67541570  | CCTCCAAAAAATATGGGACTACGTAAAAAGACCAAACCTACGTT<br>TGATTGGTGTACCTGAAAGTGACAGGGAGAATGG   | 1 |
| chr3 | 82273011  | 82273088  | CCATTCTCCCGTCACTTTCAGGTACACCAATCAAACGTAGGTT<br>TGGTCTTTTCACATAGTCCCATATTTCTTGGAGG    | 1 |
| chr3 | 98683349  | 98683426  | CCTACAAGATATATGGGACTATGTGAAAAGACCAAACCTACGTT<br>TTACTGGTGTGCCTGAAACTGACGGGGAGAATGG   | 1 |
| chr3 | 101923653 | 101923730 | CCATTCTCTGTCACCTTTCAGGTACACCAATCAAACGTAGGTT<br>TGGTCTTTTCACATAGTCCCATATTTCTTGGAGG    | 1 |
| chr3 | 114533467 | 114533544 | CCTCCAAGAAATATGGGACTATGTGAAAAGACCAAACCTACGTT<br>TCATTGGTGTACCTGAAAGTGATAGGGAGAATGG   | 1 |
| chr3 | 132607602 | 132607679 | CCTCCAAAAAATATGGGATGATGTGAAAAGACCAAACCTAGGTT<br>TGACTGGTGTACCTGAAAATGATGGGGAGAATGG   | 1 |
| chr3 | 137545176 | 137545253 | CCTCCAAGAAATATGAGACTATGTGAAAAGACCAAACCTACGTT<br>TGATTGGTGTACCTGAAAGTGACAGGGAGAATGG   | 1 |
| chr3 | 137655679 | 137655756 | CCTCCAAGAAATATGGGACTACGTGAAAAGATCAAACCTACGTT<br>TGATTGTTGTACCTGAAAGTGATGGGGAGAATGG   | 1 |
| chr3 | 137662040 | 137662117 | CCTCCAAGAAATATGGGACTATGTGAAAAGACCAAACCTACGTT<br>TGATTGTTGTACCTGAAAGTGATGGGGAGAATGG   | 1 |
| chr3 | 142133796 | 142133873 | CCTCAAAGTGTCTGGTTTTGTTTTGTTTTTAAACCATGGTT<br>TTACCTCTGGCTTAGTGGGACTAAAAATAGGAGG      | 1 |
| chr3 | 146726949 | 146727026 | CCTCCAAGAAATATGGGACTATGTGAAAAGACCAAACCTACGTT<br>TGACTGGTGTACCTGAAAGTGATGGGGAAAATGG   | 1 |
| chr3 | 152421096 | 152421173 | CCTCCAAGAAATATGGGACTGTGTGAAAAGACCAAACCTACGTT<br>TGATTGGTGTACCTCAAAGTGATGGGGAGAATGG   | 1 |

|      |           |           |                                                                                      |   |
|------|-----------|-----------|--------------------------------------------------------------------------------------|---|
| chr3 | 170620247 | 170620324 | CCATTCTCCCATCACATTTCAGGTACACCAATCAAACGTAGGTT<br>TGGTCTTTTCACATAGTCCCATATTTCTTGGAGG   | 1 |
| chr3 | 181166873 | 181166949 | CCCCTGGAAAAGTTGGAGCATCACAGGAAAAGCAAACCAACCTT<br>TTTTCTCCCTAGGTAAACTGGGGAGCCAGGGG     | 3 |
| chr3 | 181166874 | 181166949 | CCCTGGAAAAGTTGGAGCATCACAGGAAAAGCAAACCAACCTTT<br>TTTCTCCCTAGGTAAACTGGGGAGCCAGGGG      | 4 |
| chr4 | 6604233   | 6604309   | CCTTCCCCAGTTGCAGCAGACAAGAGTCTCGAAAAGCTTGCTTT<br>GGTTGCTGCAGTGGATGGGTTGGTAGGCACAGG    | 2 |
| chr4 | 6626269   | 6626344   | CCCCACCTCCCAAGCTGCTGGCTTCTCGAATAAAGCTACCTTT<br>CCTTTTACAAAACCTTGTCTCTCGAATGTCGG      | 4 |
| chr4 | 8155396   | 8155472   | CCTTGGCCCTGGACAGCTGCTTTTCCCTTAAACCTTGGTTT<br>CCCCCTTTGTGCAGGTGGTGGGTTTGGGCTGG        | 2 |
| chr4 | 10386803  | 10386880  | CCTCTTCTAGTGAACCCATGGGGTTACCAAGGGAAGCAACCTT<br>TTGATAAATATTCCCATCTTTTATGTTGTCTGG     | 1 |
| chr4 | 20701579  | 20701656  | CCACTTGAAAAGGTTACCAAGGATAAGATTTTTAAAGCTTGCTT<br>TCACAAACAACCTCATGCTCCAGGCTTGTACAGTGG | 1 |
| chr4 | 29594286  | 29594363  | CCTTCTCCCATCACATTTTCAGGTACACCAATCAAACGTAGGTT<br>TGATCTTTTCACATAGTCCCATATTTCTTGGAGG   | 1 |
| chr4 | 53668422  | 53668499  | CCATTCTCCCATCAATTTTCAGGTACACCAATGAAACGTAGGTT<br>TGGCCTTTTCACATAGTCCCATATTTCTTAGAGG   | 1 |
| chr4 | 74914802  | 74914879  | CCATTCTCCTGTCACTCTCAGGTACACCAATCAAACGTAGGTT<br>TGGTCTTTTCATATAGTCCCATATTTCTTGGAGG    | 1 |
| chr4 | 75332783  | 75332859  | CCTCCAAGAAAATTGGGACTATGTGAAAAAACCAAACCTACGTT<br>TGATTGATGTACCTGAAAGTGACAGGAGAATGG    | 3 |
| chr4 | 88123643  | 88123720  | CCTTCAAGAAATATGGGACTATGTGAAAGGACAAAACCTACGTT<br>TTATTGGTGTACCTGAAAGTGACAGGGAGAATGG   | 1 |
| chr4 | 89567192  | 89567269  | CCATTCTCCCATCACTTTTCAGGTACGCTAATCAAACGTAGGTT<br>TGATCTTTTCACATAGTCTTATATTTCTTGGAGG   | 1 |
| chr4 | 93556577  | 93556654  | CCTCCAAGAAATATGGGACTATGTGAAAAGACCAAACCTACGTT<br>TGACTGGTGTACCTCAATGTGACAGGGAGAATGG   | 1 |
| chr4 | 100266379 | 100266456 | CCATTCTCCTGTCACTTTTAGGTACACCAATCAAACGTACGTT<br>TGGTCTTTTCACATAGACCCATATTTCTTGGAGG    | 1 |
| chr4 | 103486234 | 103486311 | CCTTCAAGAAATATGGGACTGTGTGAAAAGACCAAAGCTAGGTT<br>TGATTGGTGTACCTGAAAGTGATGGGGAGAATGG   | 1 |
| chr4 | 105923129 | 105923204 | CCTACTATTACAGAGTAATGCAGTTTGTGAAAAGGTTGGTTT<br>TTGCTGACCTCTGAGAGCTCACATTACAGTGG       | 4 |
| chr4 | 106874711 | 106874788 | CCATTCTCTGTCACTTTCTGGTACACCAATCAAACGTAGGTT<br>TGCTCTTTTCACATAATCCCATATTTATTGAAGG     | 1 |
| chr4 | 115805791 | 115805867 | CCATAACATGATTTGCTGGTGTAGACTCTCCAAAGCTAGGTT<br>TCTTTCTACAACAATGGCTGGAAGTCTTCTTGG      | 3 |
| chr4 | 122033277 | 122033354 | CCATTCTCCCATCACTTTTCAGGTACACCAATCAAACGTAGGTT<br>TGGTCTTCTCACACAGTCCCATATTTCTTGGAGG   | 1 |
| chr4 | 129125132 | 129125209 | CCATTCTTCCATTACTTTTCAGGTACACCAATCAAACGTAGGTT<br>TGGTCTTTTCACATAGTCCACATTTCTTGGAGG    | 1 |
| chr4 | 135472562 | 135472639 | CCATTCTCCCTCACTTTTCAGGTACACCAATCAAACGTAGGTT<br>TGGTCTTTTCACATTGTCCCATATTTCTTGGAGG    | 1 |
| chr4 | 138507099 | 138507176 | CCATTCTCCCAGCACTTACAGGTACACCAATCAAACGTAGGTT<br>TGGTCATTTACATAGTCCCATATTTCTTGGAGG     | 1 |
| chr4 | 144249093 | 144249170 | CCATTCTCCTGTCACTTTTCAGGTACAGCAATCAAACGTAGGTT<br>TGGTCTTTTCACATGGTCCCATATTTCTTGGAGG   | 1 |
| chr4 | 144436406 | 144436483 | CCTCCAAGAAATATGAGACTATGTGAAAAGACCAAACCTACGTT<br>TGATTGGTGTACCTGAAAGTGACGGGGAGATGG    | 1 |
| chr4 | 154110259 | 154110336 | CCTCCAAGAAATATGAGACTATGTGAAAAGACCAAACCTACGTT<br>TGATTGGTGTACCTGAAAGTGACAGGGAGAATGG   | 1 |
| chr4 | 154893438 | 154893515 | CCTCCAAGAGATATGAGACTATGTAAATAGACCAAACCTACCTT<br>TGATTGGTGTACGTGAAAGTGACAGGAAGAATGG   | 1 |
| chr4 | 161116854 | 161116931 | CCATTCTCCCATCACTTTTCAGGTACACCAACCAAACGTAGGTT<br>TGGTCTTTTCACATAGTCTCATATTTCTTGGAGG   | 1 |
| chr4 | 165140748 | 165140823 | CCTCCATTGACTACTCTTATCATTGGCTAGAAAACCTACCTTT<br>CAACCAGTTTCTAAGGCCAAGAAACTTGGAGG      | 4 |
| chr4 | 181928508 | 181928585 | CCACCAAGAAATATGGGACTACGTGAAAAGACCAAACCTACGTT                                         | 1 |

|      |           |           |                                                                                      |   |
|------|-----------|-----------|--------------------------------------------------------------------------------------|---|
|      |           |           | TGATGGGTGTGCCTGAAAGTGACGGGAAGAATGG                                                   |   |
| chr4 | 187521958 | 187522035 | CCTCCAAGAAATAAGGGACTATGTGAAAAGACCAAACCTACGTT<br>TGATTGGTGTACCTGAAGGTGACAGGGAGAATGG   | 1 |
| chr5 | 12675639  | 12675715  | CCAAAGGGCCTTTGTGATTCTACTTTGTAATATAAAGGATGGTT<br>TCTTACTACGGTTGGTGTCTTGCAGGAGTGGG     | 3 |
| chr5 | 29271804  | 29271881  | CCTCCAAGAAATATGGGACTATGTGAAAAGACCAAACCTACGTT<br>TGATTGGTGTACCTGAAAGTGATGGGGAGAATGG   | 1 |
| chr5 | 35352660  | 35352737  | CCATTCTCCCGTTACTTTTCAGGTACACCAATAAAACCTAGGTT<br>TGGTCTTTTCACATAGTCCCATATTTCTTGGAGG   | 1 |
| chr5 | 38723235  | 38723310  | CCCATATCTCTGGCAAGGGCAGCTCTCTGGCTAAACCAAGCTTT<br>CCTGTAGAGCTTGAGTTCCAAGGCAGCGTTGG     | 4 |
| chr5 | 47358339  | 47358415  | CCTTGTAGTGTGTGTATTCAACTCACAGAGTTAAACGATCCTTT<br>ACACAGAGCAGACTTGAACACTCTTTGTGTGG     | 2 |
| chr5 | 47415811  | 47415887  | CCTTGTAGTGTGTGTATTCAACTCACAGAGTTAAACGATCCTTT<br>ACACAGAGCATACTTGAACACTCTTTTTGTGG     | 2 |
| chr5 | 47474614  | 47474690  | CCTTGTGTGTGTGTATTCAACTCACAGAGTTAAACGATCCTTT<br>ACACAGAGCAGACTTGAACACTCTTTTTGTGG      | 2 |
| chr5 | 48228356  | 48228432  | CCTTGTGTGTGTGTATTCAACTCACAGAGTTAAACGATCCTTT<br>ACACAGAGCAGACTTGAATACTCTTTTTGTGG      | 2 |
| chr5 | 48454551  | 48454627  | CCTTGTAGTGTGTGTATTCAACTCACAGAGTTAAACGATCCTTT<br>ACACAGAGCATACTTGAACACTCTTTTTGTGG     | 2 |
| chr5 | 48612272  | 48612348  | CCTTGTATTGTGAGTATTCAACTCACAGAGTTAAACGATCCTTT<br>ACACAGAGCAGACTTGAACACTCTTTTTGTGG     | 2 |
| chr5 | 48884165  | 48884241  | CCTTGTGTGTGTGTCTTCAACTCACAGAGTTAAACGATGCTTT<br>ACACAGAGTAGACTTGAACACTCTTTTTCTGG      | 2 |
| chr5 | 49037011  | 49037087  | CCTTGTGTGTGTGTATTCAACTCACAGAGTTAAACGATCCTTT<br>ACACAGAGCAGACTTGTAACACTCTTTTTGTGG     | 2 |
| chr5 | 49038372  | 49038448  | CCTTGTGTGTGTGTATTCAACTCACAGAGTTAAACGATCCTTT<br>ACACAGAGCAGACGTGAACACTCTTTTTGTGG      | 2 |
| chr5 | 49150718  | 49150794  | CCTTGTGTGTGTGTATTCAACTCACAGAGTTAAACGATCCTTT<br>ACACAGAGCAGACTTGAACACTCTTTTTGTGG      | 2 |
| chr5 | 49241653  | 49241729  | CCTTGTGTGTGTGTATTCAACTCACAGAGTTAAACGATCCTTT<br>ACACAGAGGAGACTTGTAACACTCTTTTTGTGG     | 2 |
| chr5 | 88582714  | 88582790  | CCTTTTCATAAGAAGAAAATCGACTCATCATTGAAACCAAGCTT<br>TGGTACAATTCATTGATGTTCCAGAAGCAGG      | 3 |
| chr5 | 93497156  | 93497231  | CCCATAGACTATGATAGAAACAAAATAACCCAAAAGCTAGCTTT<br>CTGATTGAGTTTCATAAATGCAATGTGAAGG      | 4 |
| chr5 | 94295029  | 94295105  | CCATTCACTTGTCACTTTCTGGTACACCAATCAAACGTAGGTTT<br>GGTCTTTTCACATAGTTCATATTTCTTGGAGG     | 2 |
| chr5 | 94956746  | 94956823  | CCTCCAAGAAATATGGGACTCTGTAAAGAGACCAAACCTACGTT<br>TGATTGGTGTACCTGAAAGTGAAGGGGAGAATGG   | 1 |
| chr5 | 106003488 | 106003565 | CCATTCTCCCGTCATTTTCAGGTACACCAATCAAACCTAGGTT<br>TGGTCTTTTCACATAGTCCCATATTTCTTGGAGG    | 1 |
| chr5 | 118727905 | 118727982 | CCTCCACGAAACATGGGACTATGTGAAAAGACCAAACCTACGTT<br>TGATTGGTGTACCTGAAAGTGACAGGGAGAATGG   | 1 |
| chr5 | 132156032 | 132156109 | CCAATTTCCCCCTCACTTTTCAGATACACCAATCAAACGTAGGTT<br>TGGTCTTTTCACATAGTTCATATTTCTTGGAGG   | 1 |
| chr5 | 152037951 | 152038028 | CCATTCTCCCATCACTTTTCAGGTACACCAATCAAACGTAGGTT<br>TGGTCTTTTCACATATTTCCATATGTCTTGGAGG   | 1 |
| chr5 | 155183064 | 155183141 | CCCACCGGCTCATGAGAGGTAGAGCTAAGGTCCAAACCTAGGTT<br>TATCTGAGACCGGAACCTCATGTGATTAACCTGTGG | 1 |
| chr5 | 155183065 | 155183141 | CCACCGGCTCATGAGAGGTAGAGCTAAGGTCCAAACCTAGGTTT<br>ATCTGAGACCGGAACCTCATGTGATTAACCTGTGG  | 2 |
| chr5 | 163148211 | 163148288 | CCTTCAAGAAATATGGGACTATGTGAAGAGACCAAACCTACGTT<br>TGATTGGTGTAGCCAAAAGTGATGGGGAAAATGG   | 1 |
| chr5 | 165889537 | 165889614 | CCTCAGATTAGATTTACTTGCAAAGAGACATTTAAAGGATCGTT<br>TTGATACTATTTGAAAGTACTATACAAGATGG     | 1 |
| chr5 | 169395198 | 169395274 | CCTTAAGAACATAAATCCCAGGAATTCACAGAAACCTTGGTTT<br>GAGCTTTGGATTTCCCGCAGGATGTGGGATAGG     | 2 |
| chr5 | 171021380 | 171021457 | CCATTCTCTGTCACTTTTCAGGTACACCAATCAAACGTAGGTT<br>TGGTCTTTTCATAGTCCCATATTTCTTGGAGG      | 1 |

|                                     |           |           |                                                                                      |   |
|-------------------------------------|-----------|-----------|--------------------------------------------------------------------------------------|---|
| chr5                                | 173059898 | 173059973 | CCATTTACCATCATTCTCTGTCATGGCAGGTGAAAGCAAGCTTT<br>TATATAGACAATGTTCTACTTAGTTTACAGGG     | 4 |
| chr5                                | 174102359 | 174102435 | CCCAAAGTTAATTTTACTCTTTTTCTGAATCAAAAGGAACCTTT<br>CCTCCATGAGAAGAATCCTGCCATATTTCTAGG    | 2 |
| chr5                                | 180927811 | 180927888 | CCTCCAAGAAATATGGGACTATGTGAAAAGACCAAACCTACGTT<br>TGATTGCTATACATGAAAGTGACGGGGAGAATGG   | 1 |
| chr6                                | 1752363   | 1752440   | CCTTCAAGAAATATGGGACTATGTGAAAAGACCAAACCTACCTT<br>TGATTGGTGTACCTGAAAGTGATGGGAAGAATGG   | 1 |
| chr6                                | 20595279  | 20595356  | CCATTCTCCCATCACTTTTCAGGTACACCAATCAAACGTAGGTT<br>TGGTCTTTTCACATAGTCCCATAGTTCTTGGAGG   | 1 |
| chr6                                | 23431370  | 23431447  | CCATTCTCCCGTCACTTTTCAGGGACAACAATCAAACGTAGGTT<br>TGGCCTTTGCACATAGTCTTATATTTCTTGGAGG   | 1 |
| chr6                                | 29190624  | 29190701  | CCATTCTCCCATCACTTTTCAGGTACACCAATCAAACGTAGGTT<br>TGGTCTTTTCACATAGTCCCATATTTCTTGGAGG   | 1 |
| chr6                                | 61533266  | 61533343  | CCTCCAAAAAATATGGGACTATGTGAGAAGACCAAACCTACGTT<br>TTATTAGTGTACCTCAAAGTGACAGGGAGGATGG   | 1 |
| chr6                                | 101052764 | 101052841 | CCATTCTCCCATCACTTTTCAGGTACACCAATGAAACGTAGGTT<br>TGGCCTTTTCACATAGTTTCATATTTCTTGGAGG   | 1 |
| chr6                                | 117176355 | 117176432 | CCTCCAAGAAATATGGGACTATGTGAAAAGACCAAACCTACGTT<br>TGATTGGTGTACCTGAAAGTGATGGGGAGAATGG   | 1 |
| chr6                                | 117747073 | 117747149 | CCTACAAGAAATATGGAACTTGTA AAAAGACCAAACCTACGTTT<br>GATTGGTGTACCTGAAAGTGACGGGGAGAATGG   | 2 |
| chr6                                | 118422508 | 118422585 | CCTCCAAGAAATATGGGACAATGTGAAAAGGCCAAAGCTACGTT<br>TGATTGGTGTACCTGAAAGTGACAGGGAGAATGG   | 1 |
| chr6                                | 122035019 | 122035096 | CCTTTCAAACCTAGAGGTAACAAAAGTCCGAAAACCTAGGTT<br>TGACCATAAGTTGGGACCATACGAGCATAGAAGG     | 1 |
| chr6                                | 134445210 | 134445287 | CCAAAAATAAAAAAAAAATTGACTTATAAGTAAGAAAGGTTTCGTT<br>TTCTCACATTCAGAAAGAGAACCCACATGTTGGG | 1 |
| chr6                                | 134445210 | 134445286 | CCAAAAATAAAAAAAAAATTGACTTATAAGTAAGAAAGGTTTCGTT<br>TTCTCACATTCAGAAAGAGAACCCACATGTTGG  | 3 |
| chr6                                | 135154944 | 135155021 | CCATTCTCCCATCACTTTTCAGGTACACCAATCAAACGTAGGTT<br>TGGTCTTTTCACATAGTCCCATATTTCTTGGAGG   | 1 |
| chr6                                | 137889995 | 137890072 | CCATTCTCCCGTCACTTTTCAGGTACACCAATCAAACGTGGTT<br>TAGTCTATTCACATAGTCCCATATTTCTTGGAGG    | 1 |
| chr6                                | 143993904 | 143993981 | CCGAAAAGAATAAGACTATCAGCTGAAGTCTTAAAACGATCCCT<br>TGGCCCCCAGTACTCTATATGCAGGATAGAAAGG   | 1 |
| chr6                                | 152610473 | 152610549 | CCTACAAAAATAGGGGACTATGTGATAAGACCAAACCTACGTTT<br>GATTGGTGTACCTGAAAGTGATGGGGAGAATGG    | 2 |
| chr6                                | 160372604 | 160372681 | CCATTCTACCATCACTTTTCAGGTACACCAATCAAACGTAGGTT<br>TGGCCTTTTCATATAGTCTCATATTTCTTGGAGG   | 1 |
| chr6                                | 169352478 | 169352555 | CCATTCTCCCATCACTTTCTGGTATACCAATCAAACGTAGGTT<br>TGGTCTTTTCACATAGTCCCATATTTCTTAGAGG    | 1 |
| chr6<br>_GL<br>0002<br>51v2<br>_alt | 677196    | 677273    | CCATTCTCCCATCACTTTTCAGGTACACCAATCAAACGTAGGTT<br>TGGTCTTTTCACATAGTCCCATATTTCTTGGAGG   | 1 |
| chr6<br>_GL<br>0002<br>52v2<br>_alt | 456242    | 456319    | CCATTCTCCCATCACTTTTCAGGTACACCAATCAAACGTAGGTT<br>TGGTCTTTTCACATAGTCCCATATTTCTTGGAGG   | 1 |
| chr6<br>_GL<br>0002<br>53v2<br>_alt | 456202    | 456279    | CCATTCTCCCATCACTTTTCAGGTACACCAATCAAACGTAGGTT<br>TGGTCTTTTCACATAGTCCCATATTTCTTGGAGG   | 1 |
| chr6<br>_GL<br>0002<br>54v2         | 456371    | 456448    | CCATTCTCCCATCACTTTTCAGGTACACCAATCAAACGTAGGTT<br>TGGTCTTTTCACATAGTCCCATATTTCTTGGAGG   | 1 |

|                                     |           |           |                                                                                    |   |
|-------------------------------------|-----------|-----------|------------------------------------------------------------------------------------|---|
| _alt                                |           |           |                                                                                    |   |
| chr6<br>_GL<br>0002<br>55v2<br>_alt | 456225    | 456302    | CCATTCTCCCCATCACTTTCAGGTACACCAATCAAACGTAGGTT<br>TGGTCTTTTCACATAGTCCCATATTTCTTGGAGG | 1 |
| chr6<br>_GL<br>0002<br>56v2<br>_alt | 500011    | 500088    | CCATTCTCCCCATCACTTTCAGGTACACCAATCAAACGTAGGTT<br>TGGTCTTTTCACATAGTCCCATATTTCTTGGAGG | 1 |
| chr7                                | 5256551   | 5256627   | CCACCACACCAGCCTTATGGGATGGTTTTCAAAGCATCCTTT<br>TTTAGAAGTGGATTCTGATATATAATCGGATGG    | 2 |
| chr7                                | 7392583   | 7392660   | CCATTCTCAATGTCACTTTCAGGTACACCAATCAAACGTAGGTT<br>TGGTCTTTTCACATAGTCCCATATTTCTTGGAGG | 1 |
| chr7                                | 8737741   | 8737818   | CCATTCTCTGTCACTTTCAGGTACACCAGTCAAAGGTAGGTT<br>TGTTTTATTCACACGTTCCATATTTCTTGGAGG    | 1 |
| chr7                                | 11352226  | 11352303  | CCATTCTCCCCATCACTTTCAGGTACACTAGTAAAACGTAGGTT<br>TGGTCTTTTCACATAGTCCCATATTTCTTGGAGG | 1 |
| chr7                                | 15519145  | 15519222  | CCTCCAAGAAATATGGGACTATGTGAAGAGATCAAACCTAGGTT<br>TGATTGTTGTACCTGAAAGTGATAAGAAGAATGG | 1 |
| chr7                                | 19228341  | 19228418  | CCTCCAATAAATATGGGGCTATGTGAAAAGACCAAACCTACGTT<br>TGATTGGTGTACCTGAAAGTGACAGGGAGAATGG | 1 |
| chr7                                | 23778445  | 23778522  | CCCTTTTCCCTGTCACTTTCAGGTACACCAGTCAAACGTAGGTT<br>TGGTCTTTTCACATAGTCCCATATTTCTTCAAGG | 1 |
| chr7                                | 23778446  | 23778522  | CCTTTTCCCTGTCACTTTCAGGTACACCAGTCAAACGTAGGTT<br>GGTCTTTTCACATAGTCCCATATTTCTTCAAGG   | 2 |
| chr7                                | 26769065  | 26769142  | CCATTCTCCCTGTCACTTTCAGGTACACTAATCAAACGTAGGTT<br>TGGTGTATTCACACAGTCCCATATTTCTTGGAGG | 1 |
| chr7                                | 42864035  | 42864112  | CCATTCTTCTGTCACTTTCAGGTATACCAATCAAACGTAGGTT<br>TGGTCTTTTCACATAGTCCCATGTTTCTTGGAGG  | 1 |
| chr7                                | 46498923  | 46499000  | CCTCCAAGAAATATAGACTATATGAAAATACCAAACCTACGTT<br>TGATTGGTGTACCTGAAAGAGACAGGGAGAATGG  | 1 |
| chr7                                | 51535360  | 51535437  | CCATTCTCCCTATCACTTTCAGGTACACCAATCAAACGTAGGTT<br>TGGTCTTTTCATGTAGTCCCATATTTCTTGGAGG | 1 |
| chr7                                | 51927106  | 51927183  | CCATTCTGCCGTCACTTTCAGGTACACCAATCAAACGTAGGTT<br>TGGTCTTTTCACATAGTCCCATATTTCTTGGAGG  | 1 |
| chr7                                | 56976942  | 56977018  | CCGTCCGATTATATATCAGAATCTACTTCTAAAAAAGGATGCTT<br>TTGAAAACCATCCATAAGGCTGGGTGTGGTGG   | 3 |
| chr7                                | 80021598  | 80021675  | CCTACAAGAAATATAGACTATATGAAAATACCAAACCTACGTT<br>TCACTGCTGTACCTGAAGGTGACAGGGAGAATGG  | 1 |
| chr7                                | 89673853  | 89673930  | CCATTCTCCCCATCACTTTCAGGTAAACCAATCAAAGGTAGGTT<br>TGGTCATTTACATAGTCCCATATTTCTTGGAGG  | 1 |
| chr7                                | 103404790 | 103404867 | CCATTCTCCCGTCACTTTCAGGTACACCAGTCAAACGTAGGTT<br>TGGTCTTTTCACACAGTCCCATATTTCTTGGAGG  | 1 |
| chr7                                | 113053651 | 113053728 | CCATTCTCCCCATCACTTTCAGGTACAGCAATCAAACGTAGGTT<br>TGGTCTTTTCACATAGTCCCATATTTCTTGGAGG | 1 |
| chr7                                | 125765204 | 125765279 | CCACTACAGATTCTTGGGTCAAGATGTGTGCAAAAGGATGCTTT<br>AGGGTGATGGATATGAGTGGGATGAAATGAGG   | 4 |
| chr7                                | 128042158 | 128042234 | CCTGAAAAAAACCCTGCCAGCCAGCAACTCTGAAAGGATGCTT<br>TGTGTGAGTGACAGTGTCTGAGATGGACAGGG    | 3 |
| chr7                                | 130637332 | 130637409 | CCATTCTCCCCATCACTTTCAGGTACGCCAATCAAACGTAGGTT<br>TGGTCTTTTGACATAGTCCCATATTTCTTGGAGG | 1 |
| chr7                                | 136983050 | 136983127 | CCGTCTCCCCATCACTTTTAGGTACACCAATCAAACGTAGGTT<br>TGGTCTTTTCACATAGTCTCATATTTCTTGGAGG  | 1 |
| chr7                                | 143579507 | 143579584 | CCATTCTCTGGTCACTTTCAGGTATACCAATCAAACGTAGGTT<br>TGGTCTTTTCATGTAGTCCCATATTTCTTGGAGG  | 1 |
| chr7                                | 143749881 | 143749958 | CCTCCAAGAAATATGGGACTACATGAAAAGACCAAACCTACGTT<br>TGATTGGTATACCTGAAAGTGACCAGGAGAATGG | 1 |

|                                     |           |           |                                                                                     |   |
|-------------------------------------|-----------|-----------|-------------------------------------------------------------------------------------|---|
| chr8                                | 2338364   | 2338441   | CCTCCAAGAACTATGGGACTATGTGAAAAGACCAAACCTACGTT<br>TGATTGGTGTACCTGAAAGTGACGGGGAGAATGG  | 1 |
| chr8                                | 2383289   | 2383366   | CCATTCTCCCGTCACTTTTCAGGTACACCAATCAAACGTAGGTT<br>TGGTCTTTTCACATAGTCCCATAGTTCTTGGAGG  | 1 |
| chr8                                | 8414568   | 8414645   | CCATTCTCCCGTCACTTTTCAGGTACACCAATCAAACGTAGGTT<br>TGGTCTTTTCACAGAGTCCCATATTTCTTGGAGG  | 1 |
| chr8                                | 24163142  | 24163219  | CCATTCTCCCGTCACTTTTCATGTACACCAAGCAAACGTAGGTT<br>TGATCTTTCCACATAGTCCCGTGTTCCTTGGAGG  | 1 |
| chr8                                | 34299051  | 34299128  | CCTCCAAGAAATATGGGACTATGTGAAAAGACCAAACCTACGTT<br>TGATTGGTGTACTTGAAGTGACAGGGAGAATGG   | 1 |
| chr8                                | 40965485  | 40965562  | CCTCCAAGAAATATGGGACTATGTGAAAAGACAAAACCTACGTT<br>TCACTGGTGTACTTGAAGTGACAGGGAGGATGG   | 1 |
| chr8                                | 48371659  | 48371735  | CCCCACCTTTTAAAAACATGCATACATACGGAACGTTGCTTT<br>CTGCACGATTTTCATTTTAAATGGAACAGAACAGG   | 2 |
| chr8                                | 82534960  | 82535037  | CCATTTCCCTGTCACTTTTCAGGTACACCAATCAAACGTAGGTT<br>TGGTCTTTTCACATAGTATCATATTTCTTGGAGG  | 1 |
| chr8                                | 109217624 | 109217700 | CCATTCTCCCGTCACTTTTCAGGTACACCAATCAAACGTAGGTT<br>TGGTCTTTTCACATAGTCCCATATTTCTTGGAGG  | 3 |
| chr8                                | 134790285 | 134790361 | CCTTTTGTAAAGTAATAGAATTCTGCTTCTTAAAGGAACCTTT<br>CAGGCAAGATGGTGGTTAGAGCACCTAAATGGG    | 2 |
| chr8                                | 134790285 | 134790360 | CCTTTTGTAAAGTAATAGAATTCTGCTTCTTAAAGGAACCTTT<br>CAGGCAAGATGGTGGTTAGAGCACCTAAATGG     | 4 |
| chr8<br>_KI2<br>7082<br>1v1_<br>alt | 519635    | 519712    | CCTCCAAGAACTATGGGACTATGTGAAAAGACCAAACCTACGTT<br>TGATTGGTGTACCTGAAAGTGACGGGGAGAATGG  | 1 |
| chr8<br>_KI2<br>7082<br>1v1_<br>alt | 564557    | 564634    | CCATTCTCCCGTCACTTTTCAGGTACACCAATCAAACGTAGGTT<br>TGGCCTTTTCACATAGTCCCATAGTTCTTGGAGG  | 1 |
| chr9                                | 14951207  | 14951283  | CCTCCAAGAAATATGGGACTGGTGAAGACCAAACCTACGTTT<br>GACTGGTGTACCTGAAAGTGACGGGGAGACTGG     | 2 |
| chr9                                | 23249218  | 23249295  | CCTCCAAGAAACATGGGAAATGTGTGAAAAGACCAAACCTACGTT<br>TGATTGGCGTACCTGAAAGTGACGGGGAGTATGG | 1 |
| chr9                                | 26278896  | 26278973  | CCTCCAAGAAATATGGGACTGTGTGAAAAGACCAAACCTACGTT<br>TGATTGGTATACCTGAAAGTGACAGAGAGAATGG  | 1 |
| chr9                                | 27323237  | 27323314  | CCATTCTCCCTTCACTATCAGGTACACCAATCAAACGTAGGTT<br>TAGTCTTTTCACATAGTCCCATATTTCTTGGAGG   | 1 |
| chr9                                | 31517993  | 31518070  | CCATTCTCCCGTCACTTTTCAGATACACCAGTCAAACGTAGGTT<br>TGGTCTTTTCACATAGTCCCATATTTCTTGGAGG  | 1 |
| chr9                                | 39694860  | 39694937  | CCATCTTACTTTGTACTACACTGTTCTTTAGAGAAAGCTTCCTT<br>TTGGAGACCAACCAGGACTCCTTAGAAGCAGAGG  | 1 |
| chr9                                | 42451132  | 42451209  | CCATCTTACTTTGTACTACACTGTTCTTTAGAGAAAGCTTCCTT<br>TTGGAGACCAACCAGGACTCCTTAGAAGCAGAGG  | 1 |
| chr9                                | 60776573  | 60776650  | CCTCTGCTTCTAAGGAGTCTGGTTGGTCTCCAAAAGGAAGCTT<br>TCTCTAAAGAACAGTGTAGTACAAAGTAAGATGG   | 1 |
| chr9                                | 62647482  | 62647559  | CCTCTGCTTCTAAGGAGTCTGGTTGGTCTCCAAAAGGAAGCTT<br>TCTCTAAAGAACAGTGTAGTACAAAGTAAGATGG   | 1 |
| chr9                                | 66682030  | 66682107  | CCTCTGCTTCTAAGGAGTCTGGTTGGTCTCCAAAAGGAAGCTT<br>TCTCTAAAGAACAGTGTAGTACAAAGTAAGATGG   | 1 |
| chr9                                | 82264427  | 82264503  | CCACCCTGTGCCTGGCCATTTTCACTATTCTTAAAGGAAGCTT<br>TGGTTTACAAAGGTTTGTACTGTACTTCCAGG     | 3 |
| chr9                                | 84042684  | 84042761  | CCATTCTCCCTGTCACTTTTCAGGTACACCATTCAAACGTAGGTT<br>TGGTCTTTTCTCATAGTCCCATATTTCTTGGAGG | 1 |
| chr9                                | 95256012  | 95256089  | CCTCCAAGAAATTCGGGACTATGTGAAAAGACAAAACCTACGTT<br>TAATTGGTGTGGTGTACTTGAAGTGACAAGG     | 1 |
| chr9                                | 101816988 | 101817065 | CCTCCAAGAAATATGGGACTATGTGAAAAGACCAAACCTACGTT<br>TGATTGGTGTACTTGAAGTGACCAGAAGAATGG   | 1 |
| chr9                                | 135842327 | 135842403 | CCTCCAAGAAATATGGGACTATGTGAAAAGCCCAAACCTACGTT                                        | 3 |



|           |           |           |                                                                                      |   |
|-----------|-----------|-----------|--------------------------------------------------------------------------------------|---|
|           |           |           | TGACTGATGTACCTAAAGTGACGGGGAGAATGG                                                    |   |
| chr9      | 136910865 | 136910940 | CCCGCACTGTGAGCTTGGCCGAGTGCTGTCTGAAAGCATCCTTT<br>CCCTTCACCTGGAGACTGGAGCGCCATAGAGG     | 4 |
| chr1<br>0 | 13710312  | 13710389  | CCTGTCTCCCCATTCCATGCAAATAAAAACAAACCAAGCTT<br>TGCTTTAAGTGCTCCCTGATGCAGTTCAGCGTGG      | 1 |
| chr1<br>0 | 18938129  | 18938206  | CCATTCTTCCCGTCACATTCAGGTACACCAATCAAACGTAGGTT<br>TGGTCTTTCCCATAGTCCCATATTTCTTAGAGG    | 1 |
| chr1<br>0 | 22712838  | 22712914  | CCCCCTGCTCAGCTTGGGGAAGAAAAATACAAAACGATGCTTT<br>TAGGCATTTTAAACAACCTCACTACATTGAGGG     | 2 |
| chr1<br>0 | 22712838  | 22712913  | CCCCCTGCTCAGCTTGGGGAAGAAAAATACAAAACGATGCTTT<br>TAGGCATTTTAAACAACCTCACTACATTGAGG      | 4 |
| chr1<br>0 | 40160932  | 40161009  | CCTTTGTGTGTGTGTATTCAACTCACAGAGTGAAACCTTCCTT<br>TATTCAGAGCAGTTTTGAAACACTCTTTTGTGG     | 1 |
| chr1<br>0 | 40390136  | 40390213  | CCTTTGTGTGTGTGTATTCAACTCACAGAGTGAAACCTTCCTT<br>TATTCAGAGCAGTTTTGAAAAACACTTTTTGTGG    | 1 |
| chr1<br>0 | 40409152  | 40409229  | CCTTTGTGTGTGTGTATTCAACTCACAGAGTGAAACCTTCCTT<br>TATTCAGAGCAGTTTTGAAAAACTCTTTTGTGG     | 1 |
| chr1<br>0 | 40433940  | 40434017  | CCTTTGTGTGTGTGTATTCAACTCACAGAGTGAAACCTTCCTT<br>TATTCAGAGCAGTTTTGAAACACTCTTTTGTGG     | 1 |
| chr1<br>0 | 40588155  | 40588232  | CCTTTGTGTGTGTGTATTCAACTCACAGAGTGAAACCTTCCTT<br>TATTCAGAGCAGTTTTGAAATACTCTTTTGTGG     | 1 |
| chr1<br>0 | 41146207  | 41146284  | CCTTTGTGTGTGTGTATTCAACTCACAGAGTGAAACCTTCCTT<br>TATTCAGAGCAGTTTTGAAACACTCTTTTGTGG     | 1 |
| chr1<br>0 | 43835183  | 43835260  | CCATTCTCCCTGTCACCTTCAAGTACACCAATCAAACCTAGGTT<br>TGGTCTTTTCACATAGTCCATATTTCTTGGAGG    | 1 |
| chr1<br>0 | 54913222  | 54913299  | CCCCCCCACACAGGCCCTGAGGTTTAAAGAGAAAACCATGGTT<br>TTGTGGGCCAGGCCCATGACCCTTCTCCTCTGGG    | 1 |
| chr1<br>0 | 54913222  | 54913298  | CCCCCCCACACAGGCCCTGAGGTTTAAAGAGAAAACCATGGTT<br>TTGTGGGCCAGGCCCATGACCCTTCTCCTCTGG     | 3 |
| chr1<br>0 | 54913223  | 54913299  | CCCTCCCACACAGGCCCTGAGGTTTAAAGAGAAAACCATGGTTT<br>TGTGGGCCAGGCCCATGACCCTTCTCCTCTGGG    | 2 |
| chr1<br>0 | 54913223  | 54913298  | CCCTCCCACACAGGCCCTGAGGTTTAAAGAGAAAACCATGGTTT<br>TGTGGGCCAGGCCCATGACCCTTCTCCTCTGG     | 4 |
| chr1<br>0 | 58035951  | 58036028  | CCATTCTCCCACACTTTTCAGGTACACCAATCAAACGTAGGTT<br>TCATCTTTTCACATAGTCCACGGTTTTTGGAGG     | 1 |
| chr1<br>0 | 58677525  | 58677602  | CCTCCAAGATATATGGGACTATGTGAAAAGACCAAACCTACGTT<br>TGATTGGTGTACCTGAAATGATGGGGAGAATGG    | 1 |
| chr1<br>0 | 84021390  | 84021467  | CCTCCAAGAAATATGGGACTGTGTGAAAAGAACAAACCTACGTT<br>TGATTGGTGTACGTGAAAGTATGATGGGGAGAATGG | 1 |
| chr1<br>0 | 91442692  | 91442769  | CCATTCTCCCGTCACTTTTCAGATACACAAAAAACGTAGGTT<br>TGGTCTTTCACATAGTCCACATTTCTTGGAGG       | 1 |
| chr1<br>0 | 91446848  | 91446925  | CCTCCAAGAAATGTGGGACTATGTGAAGAGACCAAACCTACGTT<br>TTTTTGGTGTATCTGAAAGTGACGGGAGGAATGG   | 1 |
| chr1<br>0 | 116928784 | 116928860 | CCTCCAAGGGGAATCTGAGTTCTCTGAAGACAAAAGCATGGTT<br>TCTTTTCTCTGTATTTCTTATTGTTTCTTAGG      | 3 |
| chr1<br>0 | 116937771 | 116937848 | CCATTCTCCCTATCACTTTCCAGTACACCAATCAAACGTAGGTT<br>TGGTCTTTTCACATAGTCCCATATTTCTTGGAGG   | 1 |
| chr1<br>1 | 31182070  | 31182147  | CCTCCAAGAAATATGGGACTATGTGAAAAGACCAAACCTACGTT<br>TGATTGGTATACTTGAATGACAAGGAGAATGG     | 1 |
| chr1<br>1 | 34739273  | 34739350  | CCTCCAAGAAATATGGGACTATGTGAAAGACCAAACCTACGTT<br>TGACTGGGTACCTGAAAGTATGATGGGGAGAATGG   | 1 |
| chr1<br>1 | 86646529  | 86646606  | CCTCTAAGAAATATGGGACTATGTGAAGAGATGAAACCTACGTT<br>TGATTGGTGTACCTGAAAGTACGAGGAGAATGG    | 1 |
| chr1<br>1 | 90469791  | 90469867  | CCCTCGTATACTACATGCTATAGTCAAAGCAGTAAACCTTCCTT<br>TCCTTAAGCAGACCACACTCTTTCATGCCTGGG    | 3 |
| chr1<br>1 | 90469792  | 90469867  | CCTCGTATACTACATGCTATAGTCAAAGCAGTAAACCTTCCTT<br>CCTTAAGCAGACCACACTCTTTCATGCCTGGG      | 4 |
| chr1<br>1 | 92429985  | 92430062  | CCATTCTCCCATCACTTTTCAGGTATACTAATCAAAGGTAGGTT<br>TGGTCTTTTCACATAGTCCCATATTTTCATGGAGG  | 1 |
| chr1      | 102818498 | 102818574 | CCATTCCCCGTCACTTTCAGGTACACCAATCAAACGTAGGTTT                                          | 2 |

|           |           |           |                                                                                      |   |
|-----------|-----------|-----------|--------------------------------------------------------------------------------------|---|
| 1         |           |           | GGTCTTTTTCACATAGTCCCATATTTCTTGGAGG                                                   |   |
| chr1<br>1 | 120765065 | 120765142 | CCATTCTCCCGTCACTTTTCAGGTACACCAATCAAACGTAGGTT<br>TTGTCTTTTCTTATAGTCCCATATTTCTTGGAGG   | 1 |
| chr1<br>1 | 123131901 | 123131978 | CCACTGCACCTGACCAAGATCCTTAATTTTTCTAAACCTACGTT<br>TATCATCTATAAAATGAGCCATCTTTTCACATGG   | 1 |
| chr1<br>1 | 129468520 | 129468597 | CCTCCGAGAAATATGGGACTATGTGAAAAGACCAAACCTACGTT<br>TGATTGTTGTACCTGAAAGTGACAGGGAGAATGG   | 1 |
| chr1<br>1 | 131272361 | 131272438 | CCATTCTCCCATCACTTTTAGGTACACCAATCAAACGTAGGTT<br>TGGTCTTTTGCATAGACCCATATTTCTTGGAGG     | 1 |
| chr1<br>1 | 132761415 | 132761492 | CCATTTTCCCGTCAGTTTCATATACACCTATCAAACGTAGGTT<br>TACTGTTTTACATAGTCCCTTATTTCTTGGAGG     | 1 |
| chr1<br>2 | 22367416  | 22367493  | CCTCCAAGAAATATGGGACTATGTGAAAAGACCAAACCTACCTT<br>TGATTGGTGTACCTGAAAGTGACGGGCAGGATGG   | 1 |
| chr1<br>2 | 33146384  | 33146461  | CCATTCTTTCGTCATTTTCAAGTACACCAATCAAACGTAGGTT<br>TGGTCTTTTTCGCATAGTCCCATATTTCTTGGAGG   | 1 |
| chr1<br>2 | 33198476  | 33198553  | CCATTCTTTCGTCACTTTTCAAGTACACCAATCAAACGTAGGTT<br>TGGTCTTTTTCACATAGTCCCATATTTCTTGGAGG  | 1 |
| chr1<br>2 | 46038332  | 46038409  | CCTCCAAGAAATATAGGACTATGTGAAAAGACCAAACCTACGTT<br>TGATTGGTGTACTTGAAAGTGACAGGGAGAATGG   | 1 |
| chr1<br>2 | 60236126  | 60236203  | CCTCCAAGAAATGTGGAATATGTGAAAAGACCAAACCTACGTT<br>TGATTGGTGTACCTGAAAGTGACAGGGAGAATGG    | 1 |
| chr1<br>2 | 62098359  | 62098434  | CCCTGACACTGATAAACGGATATGAAGAGAAAAAAGCTAGGTTT<br>TCGCTGGAATTCTAAGCTTGGGCTGCAGTGG      | 4 |
| chr1<br>2 | 62112591  | 62112668  | CCCTTCTCCAGTCACTTTTAGGTACACCAATGAAACGTAGGTT<br>TGGTCTTTTTCACACAGTCCCATATTTCTTGGAGG   | 1 |
| chr1<br>2 | 62112592  | 62112668  | CCTTCTCCAGTCACTTTTAGGTACACCAATGAAACGTAGGTTT<br>GGTCTTTTTCACACAGTCCCATATTTCTTGGAGG    | 2 |
| chr1<br>2 | 62418577  | 62418652  | CCACTCCCTCTCCCCAAAAAGTAAAGGTAGAAAACCAAGGTTT<br>ACAGGCAACAAATAGCACAATGAATGGAATGG      | 4 |
| chr1<br>2 | 71732311  | 71732388  | CCAAACCCGCATCGCACACCCTGTGAGGGGGACAAAGGAACCTT<br>TCCGTTCCACATCAAGGTTGTTTTGACCCAAGG    | 1 |
| chr1<br>2 | 78047816  | 78047893  | CCATTCTTTCGTCACTTTTCAGGTATACCAAGTCAAACCTAGGTT<br>TGGTCTTTTTCACATAGTCCCATATTTCTTGGAGG | 1 |
| chr1<br>2 | 81480016  | 81480093  | CCATTCTCCCATCACTTTTCAGGTACACCAATCAAACGTAGGTT<br>TGGTCTTTTTCACATAGTCCCATATTTCTTGGAGG  | 1 |
| chr1<br>2 | 96840231  | 96840307  | CCACACGGTAGAGGATAAACTAGGTGGATTCTCAAAGCAACCTT<br>TGAAATAATCTATGCAGTTTTTCTGGGTACTGG    | 3 |
| chr1<br>2 | 99187165  | 99187242  | CCACCAAGAAACATGGGACTATGTGAAAAGACCAAACCTACGTT<br>TGGTTGGTGTACCTGGAAGTGACGGGGAGAGTGG   | 1 |
| chr1<br>2 | 107860841 | 107860918 | CCTCCAAGAAATATGGGACCATGTGAAAAGACCAAACCTACGTT<br>TGATTGGTGTACCTGAAAGTGACAGGGAGAATGG   | 1 |
| chr1<br>2 | 110882809 | 110882885 | CCTGTA AAAAGGTCACATGGTCAGGTGTGCCTAAACGATCCTTT<br>TATTTATTTATTTATTTATTTTAAAGAAACAGG   | 2 |
| chr1<br>2 | 119063321 | 119063397 | CCAGCCCCAAAATGTCAGGGGCTTAGAACAACAAAGGTTCCCTT<br>TCATGTTTATACTACATGTTTGTCTATGGGCTGG   | 2 |
| chr1<br>3 | 35320704  | 35320781  | CCGTTTTCCCATCACTTTTCAGGTACACCAAGTCAAACGTAGGTT<br>TGGTCTTTTTCACATGGTCCCATATTTCTTGGAGG | 1 |
| chr1<br>3 | 53133477  | 53133554  | CCTGGAATAGCTTTCCTGACTGTCTGACTTCAAAAACCTTGGTT<br>TGACCACTTCGTCTATATCATGAGGAAGGACTGG   | 1 |
| chr1<br>3 | 53184880  | 53184956  | CCCTACTCTGAACCTACCTTGATAAAGCCTAGAAAACCAAGCTT<br>TGACAAGATTTGACAAGAGATGGAATTTGGAGG    | 3 |
| chr1<br>3 | 53184881  | 53184956  | CCTACTCTGAACCTACCTTGATAAAGCCTAGAAAACCAAGCTT<br>GACAAGATTTGACAAGAGATGGAATTTGGAGG      | 4 |
| chr1<br>3 | 57896962  | 57897038  | CCCTTATAAAAAGTAAAACCTTTAACCTTTTTTAAAGCATGCTTT<br>TGAATAAATCTTTTATTACAAAAAGACCAGG     | 2 |
| chr1<br>3 | 62610100  | 62610177  | CCATTCTCCCTGTCACTTTTCAGGTACACCAATCAAACGTAGGTT<br>TGGTCTTTTTCACGTAGTCCCATATTTCTTGGAGG | 1 |
| chr1<br>3 | 77004382  | 77004458  | CCCTTTTATTATCCAAGTGGTTTCTGCTCTTCAAACCTTCCCTT<br>CAAAATTTTGTCTCCTACTTAAAACAAGTTAGG    | 2 |
| chr1      | 81646075  | 81646151  | CCTTCTGTTGAGACCTACTGCTAAGAAAACAAAAAGGTTCCCTT                                         | 3 |

|                                      |           |           |                                                                                     |   |
|--------------------------------------|-----------|-----------|-------------------------------------------------------------------------------------|---|
| 3                                    |           |           | TCAAATATTATTGTGAATCAATAATGTACCTGG                                                   |   |
| chr1<br>3                            | 83755854  | 83755931  | CCTCCAAGAAATATGGGACTATGTGAAAAGACCAAACCTACGTT<br>TCATTGATGGACCTGAAAGTGATGGGGAGAATGG  | 1 |
| chr1<br>3                            | 89719199  | 89719275  | CCATTCTCCCTTCACCTTTCAGTTACACCAATCAAACGTAGGTTT<br>GGTCTTTTCACATAGTCCCATATTTCTTGGAGG  | 2 |
| chr1<br>3                            | 102010574 | 102010650 | CCTAGGGAAGTGATCATAGCTGAGTTTCTGGAAAAACCTAGGTT<br>TTAAAGTTGAGGAGACTTAAAGTCCAAAACCTGG  | 3 |
| chr1<br>3_KI<br>2708<br>41v1<br>_alt | 124240    | 124316    | CCATTCTCCCTTCACCTTTCAGTTACACCAATCAAACGTAGGTTT<br>GGTCTTTTCACATAGTCCCATATTTCTTGGAGG  | 2 |
| chr1<br>4                            | 25980646  | 25980723  | CCTCCAAGAAATATGGGACTATGTGAAAAGACTAAACCTACGTT<br>TGATTGGTGTACCTGAAAGTGACAGGGAGAATGG  | 1 |
| chr1<br>4                            | 35842786  | 35842863  | CCATTCTCCCTGTCACCTTTCAGGTATGCCAGTCAAACGTAGGTT<br>TGGTCTTTTCACATAGTCCCATATTTCTTGGAGG | 1 |
| chr1<br>4                            | 42646400  | 42646477  | CCTCCAAGAAATATGGGACTATGTAAAAAGACGAAACCTACGTT<br>TGATTGGTGTACTTAAAAGTGACGAGGAGAATGG  | 1 |
| chr1<br>4                            | 49063242  | 49063319  | CCTCCAAGAAATATGGGACTATGTGAAAAGACCAAACCTACGTT<br>TGATTTGTGTACCTGAAAGTGATGGGGAGAATGG  | 1 |
| chr1<br>4                            | 49130379  | 49130456  | CCATTCTCCCGTCACTTTCAGGCACACCAATCAAACGTAGGTT<br>TAGTCTTTTCACATAGTCCCATATTTCTTAGAGG   | 1 |
| chr1<br>4                            | 51352342  | 51352418  | CCTTAATGCATTCATATTTTCATATTTTAAATAAAACCATGGTTT<br>CCCACAGAGTGACTTCTACTCTAAGAAATGGGG  | 2 |
| chr1<br>4                            | 51352342  | 51352417  | CCTTAATGCATTCATATTTTCATATTTTAAATAAAACCATGGTTT<br>CCCACAGAGTGACTTCTACTCTAAGAAATGGG   | 4 |
| chr1<br>4                            | 60835842  | 60835919  | CCGTTCTTTCCGTCACTTTCAGGTACACCAGTCAAACGTAGGTT<br>TGGTCTTTTCACATAGTCCCATATTTCTTGGAGG  | 1 |
| chr1<br>4                            | 66529072  | 66529148  | CCATTCTCCCATCACTTTCATGTACACCAATCAAACGTAGGTT<br>TGGTCTTTGTTAACATAGTCCCATATTTCTTGG    | 3 |
| chr1<br>4                            | 79210873  | 79210949  | CCCTATAAAGCTTAGAGAAACACAGGGCTCTTTAAACGATCCTT<br>TTTCTCTTTCTGTTTTAAATTCATCACTTGG     | 3 |
| chr1<br>4                            | 79210874  | 79210949  | CCTATAAAGCTTAGAGAAACACAGGGCTCTTTAAACGATCCTTT<br>TTCTCTTTCTGTTTTAAATTCATCACTTGG      | 4 |
| chr1<br>4                            | 85371541  | 85371618  | CCATTCTCCCATCACTTTCAGGTACACTAATCAAAGGTAGGTT<br>TGGTCTTTTCACATGGTCTATATTTCTTGGAGG    | 1 |
| chr1<br>4                            | 92918713  | 92918790  | CCCCATAGCACGATCACATGGGACATTCAGGGGAAAGCAACCTT<br>TTCCAGGAAGGAAAACCCAATGCTGGGACCCAGG  | 1 |
| chr1<br>4                            | 92918714  | 92918790  | CCCATAGCACGATCACATGGGACATTCAGGGGAAAGCAACCTTT<br>TCCAGGAAGGAAAACCCAATGCTGGGACCCAGG   | 2 |
| chr1<br>4                            | 103386821 | 103386897 | CCTTTTACAGCGCTCACAGGCTATGGTTTTATAAAAGGAACCTTT<br>GATTTTGTTCATGTGAAACTACAAAATGCCAGG  | 2 |
| chr1<br>4_KI<br>2708<br>47v1<br>_alt | 33275     | 33352     | CCCCATAGCACGATCACATGGGACATTCAGGGGAAAGCAACCTT<br>TTCCAGGAAGGAAAACCCAATGCTGGGACCCAGG  | 1 |
| chr1<br>4_KI<br>2708<br>47v1<br>_alt | 33276     | 33352     | CCCATAGCACGATCACATGGGACATTCAGGGGAAAGCAACCTTT<br>TCCAGGAAGGAAAACCCAATGCTGGGACCCAGG   | 2 |
| chr1<br>5                            | 20630566  | 20630643  | CCTCCAAGAAATATTGGAGTATGTGATAAGACCAAACCTTCGTT<br>TGACTGGTGTACCTGAAAGTGATGGGGAGAATGG  | 1 |
| chr1<br>5                            | 21675103  | 21675180  | CCATTCTCCCGTCACTTTCAGGTACACCAATCAAACGTAGGTT<br>TGGTCTTTTCACATAGTCCCATATTTCTTGGAGG   | 1 |
| chr1<br>5                            | 22117571  | 22117648  | CCATTCTCCCGTCACTTTCAGGTACACCAATCAAACGTAGGTT<br>TGGTCTTTTCACATAGTCCCATATTTCTTGGAGG   | 1 |
| chr1<br>5                            | 22369744  | 22369821  | CCATTCTCCCATCACTTTCAGGTACACCAGTCAAACGAAGGTT<br>TGGTCTTATCACATACTCCAATATTTCTTGGAGG   | 1 |

|                                             |          |          |                                                                                     |   |
|---------------------------------------------|----------|----------|-------------------------------------------------------------------------------------|---|
| chr1<br>5                                   | 42302832 | 42302909 | CCTCCAAGATATATGGGACTATGTGAAAAGGCCAAACCTACCTT<br>TGATTGATACACCTGAAAATGACAGGGAGAATGG  | 1 |
| chr1<br>5                                   | 49967601 | 49967678 | CCTCCAAGAAATATGCGACTATGTGAAAAGACCAAACCTACGTT<br>TCATTGGTGTACCTGAAAGTGATGGGGAGAATGG  | 1 |
| chr1<br>5                                   | 83964501 | 83964577 | CCTCCAAGAAATATGGGACTATGTGAAAAGACCAAACCTACGTT<br>TGTTTGGTGTACCTGAAAGTGAGGGGAGAATGG   | 3 |
| chr1<br>5                                   | 87261388 | 87261465 | CCATTCTCCTCATCACTTTCAAGTACACCAATCAAACGTAGGTT<br>TGGTCTTTTCACATAGTCTTATATTTCTTGGAGG  | 1 |
| chr1<br>5_KI<br>2707<br>27v1<br>_ran<br>dom | 409348   | 409425   | CCATTCTCCCCGTCACCTTTAGGTACACCAATCAAACGTAGGTT<br>TGGTCTTTTCACATAGTCCCATATTTCTTGGAGG  | 1 |
| chr1<br>5_KI<br>2708<br>51v1<br>_alt        | 14235    | 14312    | CCATTCTCCCCATCACTTTAGGTACACCAAGTCAAACGAAGGTT<br>TGGTCTTATCACATACTCCAAATATTTCTTGGAGG | 1 |
| chr1<br>5_KI<br>2708<br>52v1<br>_alt        | 440099   | 440176   | CCATTCTCCCCGTCACCTTTAGGTACACCAATCAAACGTAGGTT<br>TGGTCTTTTCACATAGTCCCATATTTCTTGGAGG  | 1 |
| chr1<br>6                                   | 22123671 | 22123748 | CCAGCAGAAGAATCTGGGGCAGCTCTGTGAAAAAGGTACCTT<br>TCTTAAGCAGGGTTCTTATCCTTCATGGGTCTGG    | 1 |
| chr1<br>6                                   | 25557623 | 25557700 | CCTCCAAGAAATATGGGACTATGTGAAAAGACCAAACCTACGTT<br>TGATTGTTGTACCTGAAAGTGAGGGGGAGAATGG  | 1 |
| chr1<br>6                                   | 36427179 | 36427255 | CCTTGTGTTGTGTGTATTCAACTCACAGAGTTAAACGATCCTTT<br>ACACAGAGCAGATTTGAAACACTGTTTTTCTGG   | 2 |
| chr1<br>6                                   | 36476450 | 36476526 | CCTTGTGTTGTGTGTATTCAACTCACAGAGTTAAACGATCCTTT<br>ACACAGAGCAGATTTGAAACACTGTTTTTCTGG   | 2 |
| chr1<br>6                                   | 36512469 | 36512545 | CCTTGTGTTGTGTGTATTCAACTCACAGAGTTAAACGATCCTTT<br>ACACAGAGCAGATTTGAAACACTGTTTTTCTGG   | 2 |
| chr1<br>6                                   | 36520964 | 36521040 | CCTTGTGTTGTGTGTATTCAACTCACAGAGTTAAACGATCCTTT<br>ACACACAGCAGATTTGAAACACTGTTTTTCTGG   | 2 |
| chr1<br>6                                   | 36524704 | 36524780 | CCTTGTGTTGTGTGTATTCAACTCACAGAGTTAAACGATCCTTT<br>ACACAGAGCAGATTTGAAACACTGTTTTTCTGG   | 2 |
| chr1<br>6                                   | 36566812 | 36566888 | CCTTGTGTTGTGTGTATTCAACTCACAGAGTTAAACGATCCTTT<br>ACACAGAGCAGATTTGAAACACTGTTTTTCTGG   | 2 |
| chr1<br>6                                   | 36573603 | 36573679 | CCTTGTGTTGTGTGTATTCAACTCACAGAGTTAAACGATCCTTT<br>ACACAGAGCAGATTTGAAACACTGTTTTTCTGG   | 2 |
| chr1<br>6                                   | 36667694 | 36667770 | CCTTGTGTTGTGTGTATTCAACTCACAGAGTTAAACGATCCTTT<br>ACACAGAGCAGATTTGAAACACTGTTTTTCTGG   | 2 |
| chr1<br>6                                   | 36677320 | 36677396 | CCTTGTGTTGTGTGTATTCAACTCACAGAGTTAAACGATCCTTT<br>ACACAGAGCAGATTTGAAACACTGTTTTTCTGG   | 2 |
| chr1<br>6                                   | 36683096 | 36683172 | CCTTGTGTTGTGTGTATTCAACTCACAGAGTTAAACGATCCTTT<br>ACACAGAGCAGATTTGAAACACTGTTTTTCTGG   | 2 |
| chr1<br>6                                   | 36691251 | 36691327 | CCTTGTGTTGTGTGTATTCAACTCACAGAGTTAAACGATCCTTT<br>ACACAGAGCAGATTTGAAACACTGTTTTTCTGG   | 2 |
| chr1<br>6                                   | 36710951 | 36711027 | CCTTGTGTTGTGTGTATTCAACTCACAGAGTTAAACGATCCTTT<br>ACACAGAGCAGATTTGAAACACTGTTTTTCTGG   | 2 |
| chr1<br>6                                   | 36750364 | 36750440 | CCTTGTGTTGTGTGTATTCAACTCACAGAGTTAAACGATCCTTT<br>ACACAGAGCAGATTTGAAACACTGTTTTTCTGG   | 2 |
| chr1<br>6                                   | 36791455 | 36791531 | CCTTGTGTTGTGTGTATTCAACTCACAGAGTTAAACGATCCTTT<br>ACACAGAGCAGATTTGAAACACTGTTTTTCTGG   | 2 |
| chr1<br>6                                   | 36856683 | 36856759 | CCTTGTGTTGTGTGTATTCAACTCACAGAGTTAAACGATCCTTT<br>ACACAGAGCAGATTTGAAACACTGTTTTTCTGG   | 2 |
| chr1<br>6                                   | 36926655 | 36926731 | CCTTGTGTTGTGTGTATTCAACTCACAGAGTTAAACGATCCTTT<br>ACACAGAGCAGATTTGAAACACTGTTTTTCTGG   | 2 |

|           |          |          |                                                                                 |   |
|-----------|----------|----------|---------------------------------------------------------------------------------|---|
| chr1<br>6 | 36931752 | 36931828 | CCTTGTGTTGTGTGATTCAACTCACAGAGTTAAACGATCCTTT<br>ACACAGAGCAGATTTGAAACACTGTTTTCTGG | 2 |
| chr1<br>6 | 36948058 | 36948134 | CCTTGTGTTGTGTGATTCAACTCACAGAGTTAAACGATCCTTT<br>ACACAGAGCAGATTTGAAACACTGTTTTCTGG | 2 |
| chr1<br>6 | 36974541 | 36974617 | CCTTGTGTTGTGTGATTCAACTCACAGAGTTAAACGATCCTTT<br>ACACAGAGCAGATTTGAAACACTGTTTTCTGG | 2 |
| chr1<br>6 | 36981331 | 36981407 | CCTTGTGTTGTGTGATTCAACTCACAGAGTTAAACGATCCTTT<br>ACACAGAGCAGATTTGAAACACTGTTTTCTGG | 2 |
| chr1<br>6 | 36990839 | 36990915 | CCTTGTGTTGTGTGATTCAACTCACAGAGTTAAACGATCCTTT<br>ACACAGAGCAGATTTGAAACACTGTTTTCTGG | 2 |
| chr1<br>6 | 37021075 | 37021151 | CCTTGTGTTGTGTGATTCAACTCACAGAGTTAAACGATCCTTT<br>ACACAGAGCAGATTTGAAACACTGTTTTCTGG | 2 |
| chr1<br>6 | 37042812 | 37042888 | CCTTGTGTTGTGTGATTCAACTCACAGAGTTAAACGATCCTTT<br>ACACAGAGCAGATTTGAAACACTGTTTTCTGG | 2 |
| chr1<br>6 | 37085971 | 37086047 | CCTTGTGTTGTGTGATTCAACTCACAGAGTTAAACGATCCTTT<br>ACACAGAGCAGATTTGAAACACTGTTTTCTGG | 2 |
| chr1<br>6 | 37129462 | 37129538 | CCTTGTGTTGTGTGATTCAACTCACAGAGTTAAACGATCCTTT<br>ACACAGAGCAGATTTGAAACACTGTTTTCTGG | 2 |
| chr1<br>6 | 37146110 | 37146186 | CCTTGTGTTGTGTGATTCAACTCACAGAGTTAAACGATCCTTT<br>ACACAGAGCAGATTTGAAACACTGTTTTCTGG | 2 |
| chr1<br>6 | 37157309 | 37157385 | CCTTGTGTTGTGTGATTCAACTCACAGAGTTAAACGATCCTTT<br>ACACAGAGCAGATTTGAAACACTGTTTTCTGG | 2 |
| chr1<br>6 | 37183118 | 37183194 | CCTTGTGTTGTGTGATTCAACTCACAGAGTTAAACGATCCTTT<br>ACACAGAGCAGATTTGAAACACTGTTTTCTGG | 2 |
| chr1<br>6 | 37190924 | 37191000 | CCTTGTGTTGTGTGATTCAACTCACAGAGTTAAACGATCCTTT<br>ACACAGAGCAGATTTGAAACACTGTTTTCTGG | 2 |
| chr1<br>6 | 37221808 | 37221884 | CCTTGTGTTGTGTGATTCAACTCACAGAGTTAAACGATCCTTT<br>ACACAGAGCAGATTTGAAACACTGTTTTCTGG | 2 |
| chr1<br>6 | 37259501 | 37259577 | CCTTGTGTTGTGTGATTCAACTCACAGAGTTAAACGATCCTTT<br>ACACAGAGCAGATTTGAAACACTGTTTTCTGG | 2 |
| chr1<br>6 | 37272409 | 37272485 | CCTTGTGTTGTGTGATTCAACTCACAGAGTTAAACGATCCTTT<br>ACACAGAGCAGATTTGAAACACTGTTTTCTGG | 2 |
| chr1<br>6 | 37281923 | 37281999 | CCTTGTGTTGTGTGATTCAACTCACAGAGTTAAACGATCCTTT<br>ACACAGAGCAGATTTGAAACACTGTTTTCTGG | 2 |
| chr1<br>6 | 37346472 | 37346548 | CCTTGTGTTGTGTGATTCAACTCACAGAGTTAAACGATCCTTT<br>ACACAGAGCAGATTTGAAACACTGTTTTCTGG | 2 |
| chr1<br>6 | 37357000 | 37357076 | CCTTGTGTTGTGTGATTCAACTCACAGAGTTAAACGATCCTTT<br>ACACAGAGCAGATTTGAAACACTGTTTTCTGG | 2 |
| chr1<br>6 | 37373301 | 37373377 | CCTTGTGTTGTGTGATTCAACTCACAGAGTTAAACGATCCTTT<br>ACACAGAGCAGATTTGAAACACTGTTTTCTGG | 2 |
| chr1<br>6 | 37419498 | 37419574 | CCTTGTGTTGTGTGATTCAACTCACAGAGTTAAACGATCCTTT<br>ACACAGAGCAGATTTGAAACACTGTTTTCTGG | 2 |
| chr1<br>6 | 37430714 | 37430790 | CCTTGTGTTGTGTGATTCAACTCACAGAGTTAAACGATCCTTT<br>ACACAGAGCAGATTTGAAACACTGTTTTCTGG | 2 |
| chr1<br>6 | 37455845 | 37455921 | CCTTGTGTTGTGTGATTCAACTCACAGAGTTAAACGATCCTTT<br>ACACAGAGCAGATTTGAAACACTGTTTTCTGG | 2 |
| chr1<br>6 | 37458558 | 37458634 | CCTTGTGTTGTGTGATTCAACTCACAGAGTTAAACGATCCTTT<br>ACACAGAGCAGATTTGAAACACTGTTTTCTGG | 2 |
| chr1<br>6 | 37486127 | 37486203 | CCTTGTGTTGTGTGATTCAACTCACAGAGTTAAACGATCCTTT<br>ACACAGAGCAGATTTGAAACACTGTTTTCTGG | 2 |
| chr1<br>6 | 37525183 | 37525259 | CCTTGTGTTGTGTGATTCAACTCACAGAGTTAAACGATCCTTT<br>ACACAGAGCAGATTTGAAACACTGTTTTCTGG | 2 |
| chr1<br>6 | 37536735 | 37536811 | CCTTGTGTTGTGTGATTCAACTCACAGAGTTAAACGATCCTTT<br>ACACAGAGCAGATTTGAAACACTGTTTTCTGG | 2 |
| chr1<br>6 | 37554730 | 37554806 | CCTTGTGTTGTGTGATTCAACTCACAGAGTTAAACGATCCTTT<br>ACACAGAGCAGATTTGAAACACTGTTTTCTGG | 2 |
| chr1<br>6 | 37575784 | 37575860 | CCTTGTGTTGTGTGATTCAACTCACAGAGTTAAACGATCCTTT<br>ACACAGAGCAGATTTGAAACACTGTTTTCTGG | 2 |
| chr1<br>6 | 37577483 | 37577559 | CCTTGTGTTGTGTGATTCAACTCACAGAGTTAAACGATCCTTT<br>ACACAGAGCAGATTTGAAACACTGTTTTCTGG | 2 |

|           |          |          |                                                                                 |   |
|-----------|----------|----------|---------------------------------------------------------------------------------|---|
| chr1<br>6 | 37583598 | 37583674 | CCTTGTGTTGTGTGATTCAACTCACAGAGTTAAACGATCCTTT<br>ACACAGAGCAGATTTGAAACACTGTTTTCTGG | 2 |
| chr1<br>6 | 37696368 | 37696444 | CCTTGTGTTGTGTGATTCAACTCACAGAGTTAAACGATCCTTT<br>CCACAGAGCAGATTTGAAACACTGTTTTCTGG | 2 |
| chr1<br>6 | 37704524 | 37704600 | CCTTGTGTTGTGTGATTCAACTCACAGAGTTAAACGATCCTTT<br>ACACAGAGCAGATTTGAAACACTGTTTTCTGG | 2 |
| chr1<br>6 | 37706223 | 37706299 | CCTTGTGTTGTGTGATTCAACTCACAGAGTTAAACGATCCTTT<br>ACACAGAGCAGATTTGAAACACTGTTTTCTGG | 2 |
| chr1<br>6 | 37708941 | 37709017 | CCTTGTGTTGTGTGATTCAACTCACAGAGTTAAACGATCCTTT<br>ACACAGAGCAGATTTGAAACACTGTTTTCTGG | 2 |
| chr1<br>6 | 37763622 | 37763698 | CCTTGTGTTGTGTGATTCAACTCACAGAGTTAAACGATCCTTT<br>ACACAGAGCAGATTTGAAACACTGTTTTCTGG | 2 |
| chr1<br>6 | 37772115 | 37772191 | CCTTGTGTTGTGTGATTCAACTCACAGAGTTAAACGATCCTTT<br>ACACAGAGCAGATTTGAAACACTGTTTTCTGG | 2 |
| chr1<br>6 | 37791815 | 37791891 | CCTTGTGTTGTGTGATTCAACTCACAGAGTTAAACGATCCTTT<br>ACACAGAGCAGATTTGAAACACTGTTTTCTGG | 2 |
| chr1<br>6 | 37796229 | 37796305 | CCTTGTGTTGTGTGATTCAACTCACAGAGTTAAACGATCCTTT<br>ACACAGAGCAGATTTGAAACACTGTTTTCTGG | 2 |
| chr1<br>6 | 37797928 | 37798004 | CCTTGTGTTGTGTGATTCAACTCACAGAGTTAAACGATCCTTT<br>ACACAGAGCAGATTTGAAACACTGTTTTCTGG | 2 |
| chr1<br>6 | 37843453 | 37843529 | CCTTGTGTTGTGTGATTCAACTCACAGAGTTAAACGATCCTTT<br>ACACAGAGCAGATTTGAAACACTGTTTTCTGG | 2 |
| chr1<br>6 | 37848548 | 37848624 | CCTTGTGTTGTGTGATTCAACTCACAGAGTTAAACGATCCTTT<br>ACACAGAGCAGATTTGAAACACTGTTTTCTGG | 2 |
| chr1<br>6 | 37864846 | 37864922 | CCTTGTGTTGTGTGATTCAACTCACAGAGTTAAACGATCCTTT<br>ACACAGAGCAGATTTGAAACACTGTTTTCTGG | 2 |
| chr1<br>6 | 37902550 | 37902626 | CCTTGTGTTGTGTGATTCAACTCACAGAGTTAAACGATCCTTT<br>ACACAGAGCAGATTTGAAACACTGTTTTCTGG | 2 |
| chr1<br>6 | 37907307 | 37907383 | CCTTGTGTTGTGTGATTCAACTCACAGAGTTAAACGATCCTTT<br>ACACAGAGCAGATTTGAAACACTGTTTTCTGG | 2 |
| chr1<br>6 | 37928033 | 37928109 | CCTTGTGTTGTGTGATTCAACTCACAGAGTTAAACGATCCTTT<br>ACACAGAGCAGATTTGAAACACTGTTTTCTGG | 2 |
| chr1<br>6 | 37959262 | 37959338 | CCTTGTGTTGTGTGATTCAACTCACAGAGTTAAACGATCCTTT<br>ACACAGAGCAGATTTGAAACACTGTTTTCTGG | 2 |
| chr1<br>6 | 37964355 | 37964431 | CCTTGTGTTGTGTGATTCAACTCACAGAGTTAAACGATCCTTT<br>ACACAGAGCAGATTTGAAACACTGTTTTCTGG | 2 |
| chr1<br>6 | 37974881 | 37974957 | CCTTGTGTTGTGTGATTCAACTCACAGAGTTAAACGATCCTTT<br>ACACAGAGCAGATTTGAAAACTGTTTTCTGG  | 2 |
| chr1<br>6 | 37987789 | 37987865 | CCTTGTGTTGTGTGATTCAACTCACAGAGTTAAACGATCCTTT<br>ACACAGAGCAGATTTGAAACACTGTTTTCTGG | 2 |
| chr1<br>6 | 37994586 | 37994662 | CCTTGTGTTGTGTGATTCAACTCACAGAGTTAAACGATCCTTT<br>ACACAGAGCAGATTTGAAACACTGTTTTCTGG | 2 |
| chr1<br>6 | 38006479 | 38006555 | CCTTGTGTTGTGTGATTCAACTCACAGAGTTAAACGATCCTTT<br>ACACAGAGCAGATTTGAAACACTGTTTTCTGG | 2 |
| chr1<br>6 | 38011567 | 38011643 | CCTTGTGTTGTGTGATTCAACTCACAGAGTTAAACGATCCTTT<br>ACACAGAGCAGATTTGAAACACTGTTTTCTGG | 2 |
| chr1<br>6 | 38040096 | 38040172 | CCTTGTGTTGTGTGATTCAACTCACAGAGTTAAACGATCCTTT<br>ACACAGAGCAGATTTGAAACACTGTTTTCTGG | 2 |
| chr1<br>6 | 38041456 | 38041532 | CCTTGTGTTGTGTGATTCAACTCACAGAGTTAAACGATCCTTT<br>ACACAGAGCAGATTTGAAACACTGTTTTCTGG | 2 |
| chr1<br>6 | 38062179 | 38062255 | CCTTGTGTTGTGTGATTCAACTCACAGAGTTAAACGATCCTTT<br>ACACAGAGCAGATTTGAAACACTGTTTTCTGG | 2 |
| chr1<br>6 | 38102937 | 38103013 | CCTTGTGTTGTGTGATTCAACTCACAGAGTTAAACGATCCTTT<br>ACACAGAGCAGATTTGAAACACTGTTTTCTGG | 2 |
| chr1<br>6 | 38128412 | 38128488 | CCTTGTGTTGTGTGATTCAACTCACAGAGTTAAACGATCCTTT<br>ACACAGAGCAGATTTGAAACACTGTTTTCTGG | 2 |
| chr1<br>6 | 38131809 | 38131885 | CCTTGTGTTGTGTGATTCAACTCACAGAGTTAAACGATCCTTT<br>ACACAGAGCAGATTTGAAACACTGTTTTCTGG | 2 |
| chr1<br>6 | 38144723 | 38144799 | CCTTGTGTTGTGTGATTCAACTCACAGAGTTAAACGATCCTTT<br>ACACAGAGCAGATTTGAAACACTGTTTTCTGG | 2 |

|           |          |          |                                                                                    |   |
|-----------|----------|----------|------------------------------------------------------------------------------------|---|
| chr1<br>6 | 38168845 | 38168921 | CCTTGTGTTGTGTGTTCAACTCACAGAGTTAAACGATCCTTT<br>ACACAGAGCAGATTTGAAACACTGTTTTCTGG     | 2 |
| chr1<br>6 | 38209287 | 38209363 | CCTTGTGTTGTGTGTTCAACTCACAGAGTTAAACGATCCTTT<br>ACACAGAGCAGATTTGAAACACTGTTTTCTGG     | 2 |
| chr1<br>6 | 38210986 | 38211062 | CCTTGTGTTGTGTGTTCAACTCACAGAGTTAAACGATCCTTT<br>ACACAGAGCAGATTTGAAACACTGTTTTCTGG     | 2 |
| chr1<br>6 | 38229667 | 38229743 | CCTTGTGTTGTGTGTTCAACTCACAGAGTTAAACGATCCTTT<br>ACACAGAGCAGATTTGAAACACTGTTTTCTGG     | 2 |
| chr1<br>6 | 47424037 | 47424114 | CCATTCTCCCTATCACTTTCAGGTACACCAATCAAACGTAGGTT<br>TGGTCTTTTACATAGTCCCATATTTCTTGAGG   | 1 |
| chr1<br>6 | 60730549 | 60730625 | CCTCGTCACTGCCAGATTTGTGGCTACCAGCAAAGGATCGTTT<br>TAAGCTGCAACTCAGGAAATGAGAAAAATATGG   | 2 |
| chr1<br>6 | 72545014 | 72545091 | CCTCCAAGAAATATGGGACTATGTGAAAAACCAAACCTACGTT<br>TGATTGGTGTACCTGAAAGTGACAGGGAGAATGG  | 1 |
| chr1<br>6 | 81945503 | 81945579 | CCCTGTGTTCTTTTATACTAAAACAAGCCAGCAAACCAACCTTT<br>GAGATGTGTTGCCTTAAACATTACTGAATGGGG  | 2 |
| chr1<br>6 | 81945503 | 81945578 | CCCTGTGTTCTTTTATACTAAAACAAGCCAGCAAACCAACCTTT<br>GAGATGTGTTGCCTTAAACATTACTGAATGGG   | 4 |
| chr1<br>7 | 16474024 | 16474100 | CCGAGAAACGGCTTTAGCAACAAATAAAATCAAAGGATGCTT<br>TCTCTTCAGAATAATCTAAAGTAAGTTGGGAGG    | 3 |
| chr1<br>7 | 34438512 | 34438589 | CCATGTTACTCCGGATAAGGACAGCAAAGGAGGAAAGGAACCTT<br>TTCTGGGCCACCAGAAGGATGAGCTTGGGCTGG  | 1 |
| chr1<br>7 | 43690782 | 43690859 | CCCAGGGATATGCTGGCCACGGGGAGGAGCCGGAACCAACCTT<br>TGTGTCACGTGTAGTGACAAGTGCCTTTGGAGG   | 1 |
| chr1<br>7 | 43690783 | 43690859 | CCAGGGATATGCTGGCCACGGGGAGGAGCCGGAACCAACCTTT<br>GTGTCACGTGTAGTGACAAGTGCCTTTGGAGG    | 2 |
| chr1<br>7 | 69156298 | 69156375 | CCTTAGGGACCATAATGGCCACAACCAGGAGAAAAGCAAGCTT<br>TGATGCTTAAACACTACTTACAGACATGTACAGG  | 1 |
| chr1<br>7 | 74595228 | 74595305 | CCTGCCTCTGTTCTCCTTCTCGATGGTGGCGAAAGGATGCTT<br>TTGCCAGATCAACAGTCACACACAACACACCAGG   | 1 |
| chr1<br>7 | 83191644 | 83191721 | CCTGACTCCAGCCCTCCTTGACAAGGTCTCCGTAAAGCATGCTT<br>TCTCTTAGGGACCCTCAGAGGGAGGCTTGGTGGG | 1 |
| chr1<br>7 | 83191644 | 83191720 | CCTGACTCCAGCCCTCCTTGACAAGGTCTCCGTAAAGCATGCTT<br>TCTCTTAGGGACCCTCAGAGGGAGGCTTGGTGG  | 3 |
| chr1<br>8 | 35135224 | 35135300 | CCTTATTTGGAATGTGACAAGACCCATTTGTTTAAACCTTGGTT<br>TTTATGCAGAAAGAAAAGGAAGGCTGCAGTGGG  | 3 |
| chr1<br>8 | 38918861 | 38918938 | CCATTCTCCCTGTCACTTTCAGGTACACTAATCAAACGTAGGTT<br>TGCTGTTTTTACATAGGCTCATATTTCTTGAGG  | 1 |
| chr1<br>8 | 45476589 | 45476666 | CCATTCTCCCATCACTTTCAGGTACACCAGTCAAACGTAGGTT<br>TGGTCTTTTACATAGTCCCATATTTCTTGAGG    | 1 |
| chr1<br>8 | 48640821 | 48640896 | CCTGTTTTGTATTTTAGCTAATGTCAAAAAGAAAACCTTGCTTT<br>TTCTGAACCTTTCAGAGGCAGAAAGTGGGGG    | 4 |
| chr1<br>8 | 71096732 | 71096808 | CCATTTTCCCACCCTTTCACGTACAGCAATCAAACGTAGGTT<br>TGGTCTTTTCACTAGTCCCATATTTCTTGAGG     | 3 |
| chr1<br>9 | 24957844 | 24957920 | CCTTGTAGTGTGTGTTCAACTCACAGAGTTAAACGATCCTTT<br>ACACAGAGCAGACTTGAACACTCTTGTGTGG      | 2 |
| chr1<br>9 | 25015316 | 25015392 | CCTTGTAGTGTGTGTTCAACTCACAGAGTTAAACGATCCTTT<br>ACACAGAGCATACTTGAACACTCTTTTTGTGG     | 2 |
| chr1<br>9 | 25074119 | 25074195 | CCTTGTGTTGTGTGTTCAACTCACAGAGTTAAACGATCCTTT<br>ACACAGAGCAGACTTGAACACTCTTTTTGTGG     | 2 |
| chr1<br>9 | 25827861 | 25827937 | CCTTGTGTTGTGTTTATTTCAACTCACAGAGTTAAACGATCCTTT<br>ACACAGAGCAGACTTGAATACTCTTTTTGTGG  | 2 |
| chr1<br>9 | 26054056 | 26054132 | CCTTGTAGTGTGTGTTCAACTCACAGAGTTAAACGATCCTTT<br>ACACAGAGCATACTTGAACACTCTTTTTGTGG     | 2 |
| chr1<br>9 | 26211777 | 26211853 | CCTTGTATTGTGAGTATTTCAACTCACAGAGTTAAACGATCCTTT<br>ACACAGAGCAGACTTGAACACTCTTTTTGTGG  | 2 |
| chr1<br>9 | 26483670 | 26483746 | CCTTGTGTTGTGTCTTCAACTCACAGAGTTAAACGATGCTTT<br>ACACAGAGTAGACTTGAACACTCTTTTTCTGG     | 2 |
| chr1<br>9 | 26636516 | 26636592 | CCTTGTGTTGTGTGTTCAACTCACAGAGTTAAACGATCCTTT<br>ACACAGAGCAGACTTGAACACTCTTTTTGTGG     | 2 |

|           |          |          |                                                                                     |   |
|-----------|----------|----------|-------------------------------------------------------------------------------------|---|
| chr1<br>9 | 26637877 | 26637953 | CCTTGTGTTGTGTGTATTCAACTCACAGAGTTAAACGATCCTTT<br>ACACAGAGCAGACGTGAAACACTCTTTTTGTGG   | 2 |
| chr1<br>9 | 26750223 | 26750299 | CCTTGTGTTGTGTGTATTCAACTCACAGAGTTAAACGATCCTTT<br>ACACAGAGCAGACTTGAACACTCTTTTTGTGG    | 2 |
| chr1<br>9 | 26841158 | 26841234 | CCTTGTGTTGTGTGTATTCAACTCACAGAGTTAAACGATCCTTT<br>ACACAGAGGAGACTTGTAACTCTTTTTGTGG     | 2 |
| chr1<br>9 | 28517220 | 28517297 | CCAGGAAAAAATTTAACTTTCTTAACTTGATAAAAGGTAGCTT<br>TCAAACCTACAATAAATAACATACTTAGAGTGG    | 1 |
| chr1<br>9 | 34566821 | 34566898 | CCATTCTCCTCGTCACTTTTCAGGTACACCAAACAAACGTAGGTT<br>TGGTCTTTTTACGTAGTCCCATATTTCTTGGAGG | 1 |
| chr1<br>9 | 52261770 | 52261847 | CCCTCTTGAAGTTAGGGAAGTAGCATTTAAGGGAAACGTAGCTT<br>TACTATTAAGAATTTCAAACAGCACTTGTCAAGG  | 1 |
| chr1<br>9 | 52261770 | 52261846 | CCCTCTTGAAGTTAGGGAAGTAGCATTTAAGGGAAACGTAGCTT<br>TACTATTAAGAATTTCAAACAGCACTTGTCAAGG  | 3 |
| chr1<br>9 | 52261771 | 52261847 | CCTCTTGAAGTTAGGGAAGTAGCATTTAAGGGAAACGTAGCTTT<br>ACTATTAAGAATTTCAAACAGCACTTGTCAAGG   | 2 |
| chr1<br>9 | 52261771 | 52261846 | CCTCTTGAAGTTAGGGAAGTAGCATTTAAGGGAAACGTAGCTTT<br>ACTATTAAGAATTTCAAACAGCACTTGTCAAGG   | 4 |
| chr2<br>0 | 11151392 | 11151469 | CCATTCTCCCGTCACTTTTCAGGTACACCAATCAAACGTAGGTT<br>TGGTCTTTTACATATTTCCCATATTTCTTGGAGG  | 1 |
| chr2<br>0 | 14027067 | 14027143 | CCATTCTCCCTTCACTTTTCAGGTACACCAATCAAACGTAGGTTT<br>GGTCTTTTACATAGTCCCATATTTTTTGGAGG   | 2 |
| chr2<br>0 | 50615399 | 50615476 | CCTATAGTCTCAGTTACTTGGGAGGCTGAGGTAAGGATCGTT<br>TGAGCCCAGGAGGTGGAGGTTGCAGTGAGCCGG     | 1 |
| chr2<br>0 | 50615399 | 50615475 | CCTATAGTCTCAGTTACTTGGGAGGCTGAGGTAAGGATCGTT<br>TGAGCCCAGGAGGTGGAGGTTGCAGTGAGCCGG     | 3 |
| chr2<br>0 | 60909414 | 60909490 | CCTTTCCCAACTCTGCTATGCCCCACATCCTAAAGGAACCTT<br>TCTTTTTTATATATTTTATTTTAAAGTTCCAGG     | 3 |
| chr2<br>1 | 16226086 | 16226163 | CCTCCAAGAAATATGGAACATGTGAAAAGACCAAACCTACGTT<br>TGATTGACGTACCTGAAAGTGACAGGGAGAATGG   | 1 |
| chr2<br>1 | 17835234 | 17835309 | CCTCTTCTGAAAGCATGTAATCAACATTTTAAACGTAGCTTT<br>TCCCATATTTGCTAGGAAGGCTCATTCCCGGG      | 4 |
| chr2<br>1 | 19425636 | 19425713 | CCTCCAAGAAATATGGGACTATGTGAAAAGGCCAAACCTACGTT<br>TGATTGCTGTACCCGAGAGTGACGGGGAGAATGG  | 1 |
| chr2<br>1 | 32220958 | 32221035 | CCTCCAAGAAATATGGGACTATGTGAAAAGACCAAACCTACGTT<br>TGATTGGTGTACCTGAAAGTGATGGGGAGAATGG  | 1 |
| chr2<br>1 | 34335877 | 34335953 | CCCGGGCCCTGGGTGCCAGTGCCAGTGGTCAGAAAGGTTGCTT<br>TGGTGTTTTTTCAATTGTTAGTGAGACAGAGATGG  | 3 |
| chr2<br>1 | 34335878 | 34335953 | CCGGGGCCCTGGGTGCCAGTGCCAGTGGTCAGAAAGGTTGCTTT<br>GGTGTTTTTTCAATTGTTAGTGAGACAGAGATGG  | 4 |
| chr2<br>1 | 36315276 | 36315353 | CCATTCTCCCATCATTTTTCAGGTACACCAATCAAACGTAGGTT<br>TGATCTTTTACATAGCCCCATATTTCTTGGAGG   | 1 |
| chr2<br>1 | 41547952 | 41548028 | CCACCAGCACTTCTGTTAGAAGTTGCAGCAGAGAAAGGATCCTT<br>TAGGCACATCTCCAGATCCTTGCGAAGAGGGG    | 3 |
| chr2<br>2 | 18973194 | 18973271 | CCTGTGCCAGGGTCTTCCACTGGGACTGGCAGAAACGTAGGTT<br>TGCATGGAGTGAGAAGCAGGGGAGAGGTTGAGGG   | 1 |
| chr2<br>2 | 18973194 | 18973270 | CCTGTGCCAGGGTCTTCCACTGGGACTGGCAGAAACGTAGGTT<br>TGCATGGAGTGAGAAGCAGGGGAGAGGTTGAGG    | 3 |
| chr2<br>2 | 20265462 | 20265539 | CCCTCAGCCTCTCCCCTGCTTCTCACTCCATGCAAACCTACGTT<br>TCTGCCAGTCCCAGCAGAAGGACCCTGGCACGGG  | 1 |
| chr2<br>2 | 20265462 | 20265538 | CCCTCAGCCTCTCCCCTGCTTCTCACTCCATGCAAACCTACGTT<br>TCTGCCAGTCCCAGCAGAAGGACCCTGGCACGG   | 3 |
| chr2<br>2 | 20265463 | 20265539 | CCTCAGCCTCTCCCCTGCTTCTCACTCCATGCAAACCTACGTTT<br>CTGCCAGTCCCAGCAGAAGGACCCTGGCACGGG   | 2 |
| chr2<br>2 | 20265463 | 20265538 | CCTCAGCCTCTCCCCTGCTTCTCACTCCATGCAAACCTACGTTT<br>CTGCCAGTCCCAGCAGAAGGACCCTGGCACGG    | 4 |
| chrX      | 27300998 | 27301075 | CCTCCAAGAAATATGGGCTATGTGAAAAGACCAAACCTACCTT<br>TGATTGGTGTATCTGAAAGTGACGGGGAGAATGG   | 1 |
| chrX      | 28456666 | 28456743 | CCTCCAAGAAATATGGGACTATGTGAAAAGACCAAACCTACGTT<br>TGATTTGTGTACCTGAAAGTGATGGGGAGAATGG  | 1 |



|      |           |           |                                                                                    |   |
|------|-----------|-----------|------------------------------------------------------------------------------------|---|
| chrX | 35634985  | 35635062  | CCATTCTCCCGTCACTTTCAGGTACACCAATCAAACGTAGGTT<br>TGGTCTTTTCTCATTGTCCCATATTTCTTGGAGG  | 1 |
| chrX | 39460148  | 39460223  | CCCATCAAGAGCGGTTGTGCATGGCAACAGTAAAAGGATGGTTT<br>GTTACACTAGTACAAAAAGAGGTGGCCAGAGG   | 4 |
| chrX | 43926403  | 43926480  | CCATTCTCTGTCACTTTCAGGTACACCAATCAAACGTAGGTT<br>TGGTCTTTTACATAGTCCCATATTTCTTGGAGG    | 1 |
| chrX | 44254600  | 44254677  | CCTCCAAGAAATACGGGACTATGTGAAAAGACCAAACGTACGTT<br>TGATTGGTGTACCTGAAAGTGATAGGGAGAATGG | 1 |
| chrX | 46088602  | 46088679  | CCTCCAAGAAATATGGGACTATGTGAAAAGACCAAACCTACGTT<br>TGATTGGTGTACCTGAAAGTGACTGGGAGAATGG | 1 |
| chrX | 50222874  | 50222951  | CCATTCTCCCTGTCACTTTCAGGTACACGAATCAAACGTAGGTT<br>TCATCTTTTACATAGTCCCATATTTCTTAGAGG  | 1 |
| chrX | 57416835  | 57416911  | CCATTCTCTGTCACTTTCAGGTACACCAATCAAACGTAGGTT<br>TGGTCTTTTACATAGTTTACATATTTCTTGG      | 3 |
| chrX | 57856466  | 57856543  | CCTCCAAGAAATATGGGACTATGTGAAAAGACCAAACCTACGTT<br>TGATTGGTGTACCTGAAAGTGACAAGGAAAATGG | 1 |
| chrX | 62702479  | 62702556  | CCTGAAAAACATTGTTTCCAACCTGGTAAATCAAAGGAAGGTT<br>TAACTTTTGTAGATAAGTCCACATATCACAAGG   | 1 |
| chrX | 63067129  | 63067206  | CCTCCAAGAAATGTGGGACTATGGGAAAAGACCAAACCTACCTT<br>TGTTTGGTGTACCTGAAAGTGACGGGGAGAAGG  | 1 |
| chrX | 64936250  | 64936327  | CCTCCAAGAAATATGGGACTATGTGAAAAGACCAAACCTACGTT<br>TCATTGGTGTACCTGAAAGTGATGGGTAGAATGG | 1 |
| chrX | 66720099  | 66720176  | CCTACAAGAAATATGGGACTATGGGAAAAGACCAAACCTACGTT<br>TGATTGGTACTGAAAGTGACAGGGATAATGG    | 1 |
| chrX | 68529086  | 68529163  | CCATTCTCCCTGTCACTTTCAGGTACACCAATCAAAGGTAGGTT<br>TGGTCTTTTACATAGTCCCATATTTCTTGGAGG  | 1 |
| chrX | 73893994  | 73894071  | CCTCCAAGAAATATGGGACTATGTGAAAAGACCAAACCTACGTT<br>TGATTGGTGTACCTGAAAGTGATGGGGAGAATGG | 1 |
| chrX | 75723201  | 75723278  | CCATTCTCTTGTCACTTTCAGGTATACCAATCAAACGTTGGTT<br>TGGTCTTTTGCATAGTCCCATATTTTGTGGAGG   | 1 |
| chrX | 75815659  | 75815736  | CCTCCAAGAAATATGAGACTATGTGAAAAGACCAAACCTACGTT<br>TGATTAGTGTACCTGAAAATGATGGGGAGAATGG | 1 |
| chrX | 80967103  | 80967180  | CCATTCTTCTGTCACTTTCAGGTACACCAATCAAACGTAGGTT<br>TGGTCTTTTACATAGTCCCATATTTCTTGGAGG   | 1 |
| chrX | 89936425  | 89936502  | CCATTCTCCCTGTCACTTTCAGGTACACCAATCAAACGTAGGTT<br>TGTTCTTTTACATAGTCCCATATTTCTTGGAGG  | 1 |
| chrX | 91038768  | 91038845  | CCATTATCCCATCACTTTCAGGTACACCAATCAAACGTAGGTT<br>TGGTTTTTTCATAGTTCAATATTTCTTGGAGG    | 1 |
| chrX | 91471271  | 91471348  | CCTCCAAGAAATATGGGACTATCTGAAAAGATCAAACCTACGTT<br>TGATTGGTGTACCTGAAAGTGACAGGGAGAATGG | 1 |
| chrX | 96428180  | 96428257  | CCTTTCTCCCATCACTTTCAGGTACACCAATCAAACGTAGGTT<br>TGGTCTTTTACATAGTCCCATATTTCTTGGAGG   | 1 |
| chrX | 100268291 | 100268368 | CCTCCAAGAAATATGGGACTATGTGCAAAGATCAAACCTACGTT<br>TGATTGCTGTACCTGAAAGTGATGGGGAGAATGG | 1 |
| chrX | 105811046 | 105811123 | CCATTCTCCCATCACTTTCAGGTACACCAATCAAACGTAGGTT<br>TGGTCTTTTACATAATCCCATATTTCTTGGAGG   | 1 |
| chrX | 115673065 | 115673141 | CCTCCAAGAAATATGGGACCATGGAAAAGATCAAACCTACGTTT<br>GACTGGTGTACCTGAAAGTGACTGGGAGAATGG  | 2 |
| chrX | 117269846 | 117269923 | CCTCCAAGAAATATGGGACTATGTGAAAAGACCAAACCTACGTT<br>TGATTGGAGTACTTGAAAATGACAGGGATAATGG | 1 |
| chrX | 139191369 | 139191445 | CCTTTAAAGACATGCTCTTTGTGCCAGAAATCAAAGGTTGCTT<br>TTATGTCCAGTGGGGTGGAGGGAGGAAGCTCGG   | 3 |
| chrX | 147988614 | 147988691 | CCATTCTCCCGTCACTTTCAGGGACCTCAATCAAACGTAGGTT<br>TTGTCTTTTACATAGTCCCATATTTCTTGGAGG   | 1 |
| chrX | 155321041 | 155321118 | CCTCCAAGAAATATAGGACTATGTGAAAAGACCAAACCTACGTT<br>TGACTGGTGTACCTGAAAGTGACAGGGAGAATGG | 1 |
| chrY | 15109391  | 15109468  | CCATTCTCCCATCACTTTCAGGTACACCAATCAAAGGTAGGTT<br>TGGTCTTTTACATAGTCCCATATTTCTTGCAGG   | 1 |

Chromosomal sites were identified by searching for  $CCX_{(30-31)}-AAASSWWSSTTT-X_{(30-31)}-GG$  where W is T or A and S is G or C. Pattern 1 is  $CCX_{(31)}-AAASSWWSSTTT-X_{(31)}$

GG 2 is  $CCX_{(30)}-AAASSWWSSTTT-X_{(31)}-GG$ , 3 is  $CCX_{(31)}-AAASSWWSSTTT-X_{(30)}-GG$  and 4 is  $CCX_{(30)}-AAASSWWSSTTT-X_{(30)}-GG$ . Only the + strand is shown and the start and end corresponds to the first and last base pair in the chromosome (GRCh38) or alternate assembly when applicable. Source code is described in Note 3.

Supplementary Table 8 is available for download at <<https://goo.gl/Bisq30>>.

For access while article is in review, please login using Username: LiuLabPrograms, Password: recCas9 upon reaching the webpage.

## Methods for supporting material

### *Episomal DNA extraction and DNA sequencing*

Transfections of HEK293T cells were performed under the conditions described in the methods of the main text. Episomal DNA was extracted using a modified HIRT extraction involving alkaline lysis and spin column purification essentially as described (2, 3). After harvesting, HEK293T cells were washed in 500  $\mu$ L of ice cold PBS and resuspended in 250  $\mu$ l GTE Buffer (50 mM glucose, 25 mM Tris-HCl, 10 mM EDTA and pH 8.0) incubated at room temperature for 5 minutes and lysed on ice for 5 minutes with 200  $\mu$ l lysis buffer (200 mM NaOH, 1% sodium dodecyl sulfate). Lysis was neutralized with 150  $\mu$ l of a potassium acetate solution (5M acetate, 3 M potassium, pH 6.7). Cell debris were pelleted by centrifugation at 21,130 x g for 15 minutes and lysate was applied to Econospin Spin columns (Epoch Life Science, Missouri City, TX), washed twice with 750  $\mu$ l wash buffer (Omega Bio-tek, Norcross, GA), and eluted in TE 45  $\mu$ l (pH 8.0).

Isolated episomal DNA was digested for 2 hours at 37 °C with RecBCD (10 U) per manufactures instructions and purified into 10  $\mu$ L EB with a MinElute Reaction Cleanup Kit (Qiagen, Valencia, CA). Mach1-T1 chemically competent cells were transformed with 5  $\mu$ L of episomal extractions and plated on agarose plates selecting for carbenicillin resistance. Individual colonies were sequenced with pCALNL-for1 to determine the rate of recombination. Sequencing reads revealed either the 'left' intact non-recombined recCas9 site, the expected recombined product, rare instances of 'left' non-recombined site with small indels, or one instance of a large deletion product.

### *Reporter construction*

A five-piece Golden Gate assembly was used to construct reporters described in the text. Fragments 1-5 were flanked by Esp3I sites; Esp3I digestion created complementary 5' overhangs specifying the order of fragment assembly (Supplementary Figure 1). Fragments 1, 2, 4, and 5 were created by annealing forward and reverse complementary oligonucleotides listed in Table 5. Fragments were annealed by mixing 10  $\mu$ l of each oligonucleotide (100  $\mu$ M) in 20  $\mu$ l of molecular grade water, incubating at 95°C for 3 minutes and reducing the temperature to 16 °C at a rate of -0.1 °C/sec. Fragment 3 was created by PCR amplifying the region containing kanR and a PolyA stop codon with primers 3-for and 3-rev. These primers also appended Esp3I on the 5' and 3' ends of this sequence.

Annealed fragments 1, 2, 4 and 5 were diluted 12,000 fold and 0.625  $\mu$ l of each fragment were added to a mixture containing the following.

- 1) 40-50 ng fragment 3
- 2) 100 ng pCALNL EGFP-Esp3I
- 3) 1  $\mu$ L Tango Buffer (10X)

- 4) 1  $\mu$ L DTT (10 mM)
- 5) 1  $\mu$ L ATP (10 mM)
- 6) 0.25  $\mu$ L T7 ligase (3,000 U/ $\mu$ L)
- 7) 0.75  $\mu$ L Esp3I (10 U/ $\mu$ L)
- 8) H<sub>2</sub>O up to 10  $\mu$ L

Reactions were incubated in thermal cycler programmed for 20 cycles [37°C for 5 min, 20°C].

After completion of the Golden Gate reactions, 7  $\mu$ L of each reaction was mixed with 1  $\mu$ L of ATP (10 mM), 1  $\mu$ L of 10X Plasmid Safe ATP-dependent DNase buffer (10X), and 1  $\mu$ L of Plasmid Safe ATP-dependent DNase (10 U/ $\mu$ L) (Epicentre, Madison, WI) to remove linear DNA and reduce background. DNase digestions were incubated at 37°C for 30 min and heat killed at 70°C for 30 min. Half (5  $\mu$ L) of each reaction was transformed into Mach1-T1 cells. Colonies were analyzed by colony PCR and sequenced.

The protocol was modified for reporters used in Figure 4. Two gBlocks, encoding target sites to the 5' or 3' of the PolyA terminator were used instead of fragments 1, 2, 4 and 5. These gBlocks (10 ng) were added to the MMX, which was cycled 10 times [37°C for 5 min, 20°C] and carried forward as described above.

**Note S1: DNA sequence of target sites flanking a KanR and PolyA stop sequences.**

**ACGCGT**CCCCAATTTTCCCAAACAGAGGTCTGTAAACCGAGGTTTTGGAA  
CCTCTGTTTGGGAAAATT**GGG**GAGTCGAGTCGGATTTGATCTGATCAAGA  
GACAGGATGAGGATCGTTTCGCATGATTGAACAAGATGGATTGCACGCAG  
GTTCTCCGGCCGCTTGGGTGGAGAGGCTATTCGGCTATGACTGGGCACA  
ACAGACAATCGGCTGCTCTGATGCCGCCGTGTTCCGGCTGTCAG/TCGCA  
GGGGCGCCCGGTTCTTTTTGTCAAGACCGACCTGTCCGGTGCCCTGAATG  
AACTGCAGGACGAGGCAGCGCGGCTATCGTGGCTGGCCACGACGGGCG  
TTCCTTGCGCAGCTGTGCTCGACGTTGTCACTGAAGCGGGAAGGGACTG  
GCTGCTATTGGGCGAAGTGCCGGGGCAGGATCTCCTGTCATCTCACCTTG  
CTCCTGCCGAGAAAGTATCCATCATGGCTGATGCAATGCGGCGGCTGCAT  
ACGCTTGATCCGGCTACCTGCCATTCGACCACCAAGCGAAACATCGCAT  
CGAGCGAGCACGTAICTCGGATGGAAGCCGGTCTTGTCGATCAGGATGAT  
CTGGACGAAGAGCATCAGGGGCTCGCGCCAGCCGAAGTTCGCCAGGC  
TCAAGGCGCGCATGCCCGACGGCGAGGATCTCGTCGTGACCCATGGCGA  
TGCCTGCTTGCCGAATATCATGGTGGAAAATGGCCGCTTTTCTGGATTCAT  
CGACTGTGGCCGGCTGGGTGTGGCGGACCGCTATCAGGACATAGCGTTG  
GCTACCCGTGATATTGCTGAAGAGCTTGGCGGCGAATGGGCTGACCGCTT  
CCTCGTGCTTTACGGTATCGCCGCTCCCGATTCCGAGCGCATCGCCTTCT  
ATCGCCTTCTTGACGAGTTCTTCTGAGCGGGACTCTGGGGTTCGAAATGA  
CCGACCAAGCGACGCCCAACCTGCCATCACGAGATTTGATTCCACCGCC  
GCCTTCTATGAAAGGTTGGGCTTCGGAATCGTTTTCCGGGACGCCGGCTG  
GATGATCCTCCAGCGCGGGGATCTCATGCTGGAGTTCTTCGCCACCCCA  
TCGATAAC**TGTTTATTGCAGCTTATAATGGTTACAAATAAAGCAATAGCAT**  
**CACAAATTTACAAATAAAGCATTTTTTTCACTGCATTCTAGTTGTGGTTTG**  
**TCCAAACTCATCAATGTATCTTATCATGTCTGGATCAAATCCGAACGCACC**  
**CCCAATTTTCCCAAACAGAGGTCTGTAAACCGAGGTTTTGGAACCTCTGTT**  
**TGGGAAAATTGGGCTCGAG**

A representative sequence containing a kan resistance marker (highlighted in green) and PolyA terminator (highlighted in red) flanked by two identical target sites. The target sites shown are both PAM\_NT1-0bp-gix\_core-0bp-NT1\_PAM (see Table 1). Protoadjacent spacer motifs (PAMs) are in bold. Base pair spacers are lower case. Gix site or pseudo sites are in italics and dCas9 binding sites are underlined. For the genomic reporter plasmids used in the assays of Figure 4, a G to T transversion was observed in the kanamycin resistance marker, denoted by a G/T in the sequence above. This was present in all the reporters used in this figure, and we do not anticipate affecting the results as it is far remove from the PolyA terminator and recCas9 target sites.

**Note S2. DNA and amino acid sequence of Ginβ-(GGG)<sub>8</sub>-dCas9-GGS-FLAG-GGS-NLS.**

DNA sequence of GinB-8GGG-dCas9-GGS-FLAG-GGS-NLS. Sequence encoding Ginβ is shown colored in green; those encoding GGS linkers are shown colored orange; those encoding dCas9 linkers are black; those encoding the FLAG tag and NLS are in blue and cyan respectively.

```
ATGCTCATTGGCTACGTGCGCGTCTCAACTAACGACCAGAATACCGATCTTCA
GAGGAACGCACTGGTTTGTGCAGGCTGCGAACAGATTTTCGAGGACAACTCA
GCGGGACACGGACGGACAGACCTGGCCTCAAGCGAGCACTCAAGAGGCTGC
AGAAAGGAGACACTCTGGTGGTCTGGAATTGGACCGCCTGGGTGCAAGCAT
GAAGCATCTCATTCTCTGGTTGGCGAACTGCGAGAAAGGGGGATCAACTTTC
GAAGTCTGACGGATTCCATAGATAACAAGCAGCCCATGGGCCGTTCTTCTTC
TACGTGATGGGTGCACTGGCTGAAATGGAAAGAGAACTCATTATAGAGCGAAC
CATGGCAGGGCTTGC GGCTGCCAGGAATAAAGGCAGGCGGTTTGGAAGACCA
CCAAAGGGTGGATCCGGAGGGTCCGGAGGTAGTGGCGGCAGCGGTGGTTCA
GGTGGCAGCGGAGGGTCAGGAGGCTCTGATAAAAAGTATTCTATTGGTTTAGC
TATCGGCACTAATTCCGTTGGATGGGCTGTCATAACCGATGAATACAAAGTAC
CTTCAAAGAAATTTAAGGTGTTGGGGAACACAGACCGTCATTTCGATTA AAAAGA
ATCTTATCGGTGCCCTCCTATTTCGATAGTGGCGAAACGGCAGAGGCGACTCG
CCTGAAACGAACCGCTCGGAGAAGGTATACACGTCGCAAGAACCGAATATGTT
ACTTACAAGAAATTTTTAGCAATGAGATGGCCAAAGTTGACGATTCTTTCTTTCA
CCGTTTGGAAGAGTCCTTCCTTGTGCAAGAGGACAAGAAACATGAACGGCACC
CCATCTTTGGAAACATAGTAGATGAGGTGGCATATCATGAAAAGTACCCAACG
ATTTATCACCTCAGAAAAAAGCTAGTTGACTCAACTGATAAAGCGGACCTGAG
GTTAATCTACTTGGCTCTTGCCCATATGATAAAGTTCCGTGGGCACTTTCTCAT
TGAGGGTGATCTAAATCCGGACAACCTCGGATGTGACAAACTGTTCCATCCAGT
TAGTACAAACCTATAATCAGTTGTTTGAAGAGAACCCTATAAATGCAAGTGGCG
TGGATGCGAAGGCTATTCTTAGCGCCCGCCTCTCTAAATCCCGACGGCTAGAA
AACCTGATCGCACAATTACCCGGAGAGAAGAAAAATGGGTTGTTCCGGTAACCT
TATAGCGCTCTCACTAGGCTGACACCAAATTTAAGTCGAACTTCGACTTAGC
TGAAGATGCCAAATTGCAGCTTAGTAAGGACACGTACGATGACGATCTCGACA
ATCTACTGGCACA AATTGGAGATCAGTATGCGGACTTATTTTTGGCTGCCAAAA
ACCTTAGCGATGCAATCCTCCTATCTGACATACTGAGAGTTAATACTGAGATTA
CCAAGGCGCCGTTATCCGCTTCAATGATCAAAGGTACGATGAACATCACCAA
GACTTGACACTTCTCAAGGCCCTAGTCCGTGAGCAACTGCCTGAGAAATATAA
GGAAATATTCTTTGATCAGTCGAAAAACGGGTACGCAGGTTATATTGACGGCG
GAGCGAGTCAAGAGGAATTCTACAAGTTTATCAAACCCATATTAGAGAAGATG
GATGGGACGGAAGAGTTGCTTGTA AACTCAATCGCGAAGATCTACTGCGAAA
GCAGCGGACTTTCGACAACGGTAGCATTCCACATCAAATCCACTTAGGCGAAT
TGCATGCTATACTTAGAAGGCAGGAGGATTTTTATCCGTTCTCAAAGACAATC
GTGAAAAGATTGAGAAAATCCTAACCTTTTCGCATACCTTACTATGTGGGACCCC
TGGCCCGAGGGA ACTCTCGGTTTCGCATGGATGACAAGAAAGTCCGAAGAAAC
GATTACTCCATGGAATTTTGAGGAAGTTGTCGATAAAGGTGCGTCAGCTCAAT
CGTTCATCGAGAGGATGACCAACTTTGACAAGAATTTACCGAACGAAAAAGTAT
```

TGCCTAAGCACAGTTTACTTTACGAGTATTTACAGTGTACAATGAACTCACGA  
AAGTTAAGTATGTCAGTGGGATGCGTAAACCCGCCTTTCTAAGCGGAGAA  
CAGAAGAAAGCAATAGTAGATCTGTTATTCAAGACCAACCGCAAAGTGACAGT  
TAAGCAATTGAAAGAGGACTACTTTAAGAAAATTGAATGCTTCGATTCTGTCTGA  
GATCTCCGGGGTAGAAGATCGATTTAATGCGTCACTTGGTACGTATCATGACC  
TCCTAAAGATAATTAAGATAAGGACTTCCTGGATAACGAAGAGAATGAAGATA  
TCTTAGAAGATATAGTGTGACTCTTACCCTCTTTGAAGATCGGGAAATGATTG  
AGGAAAGACTAAAAACATACGCTCACCTGTTTCGACGATAAGGTTATGAAACAG  
TTAAAGAGGGCGTCGCTATACGGGCTGGGGACGATTGTCTCGCGGAACTTATCAA  
CGGGATAAGAGACAAGCAAAGTGGTAAACTATTCTCGATTTTCTAAAGAGCG  
ACGGCTTCGCCAATAGGAACTTTATGCAGCTGATCCATGATGACTCTTTAACCT  
TCAAAGAGGATATACAAAAGGCACAGGTTTCCGGACAAGGGGACTCATTGCAC  
GAACATATTGCGAATCTTGCTGGTTCGCCAGCCATCAAAAAGGGCATACTCCA  
GACAGTCAAAGTAGTGGATGAGCTAGTTAAGGTCATGGGACGTCACAAACCG  
GAAAACATTGTAATCGAGATGGCACGCGAAAATCAAACGACTCAGAAGGGGCA  
AAAAACAGTTCGAGAGCGGATGAAGAGAATAGAAGAGGGTATTAAAGAACTGG  
GCAGCCAGATCTTAAAGGAGCATCCTGTGGAAAATACCCAATTGCAGAACGAG  
AACTTTACCTCTATTACCTACAAAATGGAAAGGGACATGTATGTTGATCAGGAA  
CTGGACATAAACCGTTTATCTGATTACGACGTCGATGCCATTGTACCCCAATCC  
TTTTTGAAGGACGATTCAATCGACAATAAAGTGCTTACACGCTCGGATAAGAAC  
CGAGGGAAAAGTGACAATGTTCCAAGCGAGGAAGTCGTAAAGAAAATGAAGAA  
CTATTGGCGGCAGCTCCTAAATGCGAAACTGATAACGCAAAGAAAGTTTCGATA  
ACTTAACTAAAGCTGAGAGGGGTGGCTTGTCTGAACTTGACAAGGCCGGATTT  
ATTAACGTCAGCTCGTGGAAACCCGCCAAATCACAAAGCATGTTGCACAGAT  
ACTAGATTCCTGAATGAATACGAAATACGACGAGAACGATAAGCTGATTCGGG  
AAGTCAAAGTAATCACTTTAAAGTCAAATTGGTGTCTCGGACTTCAGAAAGGATT  
TTCAATTCTATAAAGTTAGGGAGATAAATAACTACCACCATGCGCACGACGCTT  
ATCTTAATGCCGTCGTAGGGACCGCACTCATTAAGAAATACCCGAAGCTAGAA  
AGTGAGTTTGTGTATGGTGATTACAAAGTTTATGACGTCCGTAAGATGATCGCG  
AAAAGCGAACAGGAGATAGGCAAGGCTACAGCCAATACTTCTTTTATTCTAAC  
ATTATGAATTTCTTTAAGACGGAAATCACTCTGGCAAACGGAGAGATACGAAA  
CGACCTTTAATTGAAACCAATGGGGAGACAGGTGAAATCGTATGGGATAAGGG  
CCGGGACTTCGCGACGGTGAGAAAAGTTTTGTCCATGCCCAAGTCAACATAG  
TAAAGAAAAGTGAAGTGCAGACCGGAGGGTTTTCAAAGGAATCGATTCTTCCA  
AAAAGGAATAGTGATAAGCTCATCGCTCGTAAAAAGGACTGGGACCCGAAAAA  
GTACGGTGGCTTCGATAGCCCTACAGTTGCCTATTCTGTCTAGTAGTGGCAA  
AAGTTGAGAAGGGAAAATCCAAGAACTGAAGTCAGTCAAAGAATTATTGGGG  
ATAACGATTATGGAGCGCTCGTCTTTTAAAAGAACCCCATCGACTTCCTTGAG  
GCGAAAGGTTACAAGGAAGTAAAAAAGGATCTCATAATTAAGTACCAAAGTAT  
AGTCTGTTTGGAGTTAGAAAATGGCCGAAAACGGATGTTGGCTAGCGCCGGAGA  
GCTTCAAAGGGGAACGAACCTCGCACTACCGTCTAAATACGTGAATTTCTGT  
ATTTAGCGTCCCATTACGAGAAGTTGAAAGTTACCTGAAGATAACGAACAG  
AAGCAACTTTTTGTTGAGCAGCACAAACATTATCTCGACGAATCATAGAGCAA  
ATTTCCGAATTCAGTAAGAGAGTCATCCTAGCTGATGCCAATCTGGACAAAGTA  
TTAAGCGCATACAACAAGCACAGGGATAAACCCATACGTGAGCAGGCGGAAAA  
TATTATCCATTTGTTACTTTACCAACCTCGGCGCTCCAGCCGCATTCAAGTA

TTTTGACACAACGATAGATCGCAAACGATACACTTCTACCAAGGAGGTGCTAG  
ACGCGACACTGATTCACCAATCCATCACGGGATTATATGAAACTCGGATAGATT  
TGTCACAGCTTGGGGGTGACGGTGGCTCCGATTATAAGGATGATGACGACAA  
GGGAGGTTCCCAAAGAAGAAAAGGAAGGTCTGA

Amino acid sequence of the GinB-8GGG-dCas9-GGS-FLAG-GGS-NLS. The color scheme is the same as the DNA sequence.

MLIGYVRVSTNDQNTDLQRNALVCAGCEQIFEDKLSGTRTRDRPGLKRALRQLQKG  
DTLVVWKLDRDLGRSMKHLISLVGELRERGINFRSLTDSIDTSSPMGRFFFFYVMGAL  
AEMERELIERTMAGLAAARNKGRRFGRPPKGGSSGGSSGGSSGGSSGGSSGGSSG  
GSDKKYSIGLAIGTNSVGWAVITDEYKVPSSKFKVLGNTDRHSIKKNLIGALLFDSG  
ETAEARLKRTRARRRYTRRKNRICYLQEIFSNEMAKVDDSSFFHRLEESFLVEEDKK  
HERHPIFGNIVDEVAYHEKYPTIYHLRKKLVDSTDKADLRILIYLAHAHMIKFRGHFLI  
EGDLNPDNSDVKLFIQLVQTYNQLFEENPINASGVDAKAILSARLSKSRRENLIA  
QLPGEKKNGLFGNLIASLGLTPNFKSNFDLAEDAQLQSKDQYDLDNLLAQIG  
DQYADLFLAAKNLSDAILLSDILRVNTEITKAPLSASMIKRYDEHHQDLTLLKALVRQ  
QLPEKYKEIFFDQSKNGYAGYIDGGASQEEFYKFIKPILEKMDGTEELLVKNREDL  
LRKQRTFDNGSIPHQIHLGELHAILRRQEDFYFPLKDNREKIEKILTFRIPYYVGPLA  
RGNSRFAWMTRKSEETITPWNFEVVDKGSASAQSFIERMTNFDKNLPNEKVLPHK  
SLLYEYFTVYNELTKVKYVTEGMRKPAFLSGEQKKAIVDLLFKTNRKVTVKQLKED  
YFKKIECFDSVEISGVEDRFNASLGTYHDLLKIIKDKDFLDNEENEDILEDIVLTLTLF  
EDREMIEERLKTYAHLFDDKVMKQLKRRRYTGWGRLSRKLINGIRDKQSGKTILDF  
LKSDGFANRNFMQLIHDDSLTFKEDIQKAQVSGQGDSLHEHIANLAGSPAIKKGILQ  
TVKVVDDELVKVMGRHKPENIVIEMARENQTTQKGQKNSRERMKRIEKGKELGSQI  
LKEHPVENTQLQNEKLYLYYLQNGRDMYVDQELDINRLSDYDVAIVPQSFLKDD  
SIDNKVLTRSDKNRGKSDNVPSEEVVKKMKNYWRQLLNAKLITQRKFDNLTKAER  
GGLSELKAGFIKRQLVETRQITKHVAQILD SRMNTKYDENDKLIREVKVITLKSCLV  
SDFRKDFQFYKVVREINNYHHAHDAYLNAVVG TALIKKYPKLESEFVYGDYKVYDVR  
KMIKSEQEIGKATAKYFFYSNIMNFFKTEITLANGEIRKRPLIETNGETGEIVWDKG  
RDFATVRKVL SMPQVNIVKKTEVQTGGFSKESILPKRNSDKLIARKKDWDPKKYG  
GFDSPTVAYSVLVAKVEKGKSKLKSVELL GITIMERSSEFKNPIDFLEAKGYKE  
VKKDLIIKLPKYSLFELENGRKRMLASAGELQKGNELALPSKYVNFYLYLASHYEKLG  
GSPEDNEQKQLFVEQHKHYLDEIIEQISEFSKRVLADANLDKVL SAYNKHRDKPIR  
EQAENIIHLFTLTNLGAPAAFKYFDTTIDRKRYTSTKEVLDATLIHQSI TGLYETRIDL  
SQLGGDGGSDYKDDDDKGGSPKKRKYVStop



**Note S3. Source code for recCas9 genomic target identification**

All software scribed in this manuscript is available for download at <https://goo.gl/Bisq30>. For access while this manuscript is in review, please login using Username = LiuLabPrograms and Password = recCas9

#### **Note S4. Limiting dilution quantification of recCas9 genomic deletion**

As described in the Methods, we can infer the number of genomes present in a given amount of template DNA, and thus estimate a minimum deletion efficiency for recCas9 at the *FAM19A2* locus. For example, take the case of a two-fold dilution series, beginning with 20 ng genomic DNA template. After nested PCR, only the well seeded with 20 ng yielded the correct PCR product. At 3.6 pg per genome, that PCR contained approximately 5500 genomes, and since at least one recombinant genome must have been present, the minimum deletion efficiency is 1 in 5500 or 0.018%.

We chose to quantify the levels of genomic DNA using a limiting dilution of genomic template because using quantitative PCR (qPCR) to determine the absolute level of genome editing would require a set of PCR conditions that unambiguously and specifically amplify only from post-recombined genomic DNA. As shown in Figure 5B, primary PCR using genomic DNA as template results in a roughly 2.5 kb off-target band as the dominant species; a second round of PCR using nested primers is required to reveal guide RNA- and recCas9-dependent genome editing.

## References for supporting material

1. N. E. Sanjana *et al.*, A transcription activator-like effector toolbox for genome engineering. *Nature protocols* **7**, 171-192 (2012).
2. K. Motmans, S. Thirion, J. Raus, C. Vandevyver, Isolation and quantification of episomal expression vectors in human T cells. *Biotechniques* **23**, 1044-1046 (1997).
3. B. Hirt, Selective extraction of polyoma DNA from infected mouse cell cultures. *J Mol Biol* **26**, 365-369 (1967).
